# Supplementary material for: Physician-directed genetic screening to evaluate personal risk for medically actionable disorders: a large multi-center cohort study
Source: PubMed Central journal article supplement (PMC8371767; doi:10.1186/s12916-021-01999-2), 2021-08-18
Supplement: 12916_2021_1999_MOESM1_ESM.pdf [file 12916_2021_1999_MOESM1_ESM.pdf]

**Table S1. Details of genes included in proactive screening.**

| <b>Gene</b>    | <b>Conditions*</b>                                                                                                             | <b>MIM</b> | <b>Inheritance Patterns</b> |
|----------------|--------------------------------------------------------------------------------------------------------------------------------|------------|-----------------------------|
| <i>ACTA2</i>   | Thoracic aortic aneurysms and dissections                                                                                      | 102620     | AD                          |
| <i>ACTC1</i>   | Atrial septal defect<br>Dilated cardiomyopathy<br>Hypertrophic cardiomyopathy<br>Left ventricular noncompaction cardiomyopathy | 102540     | AD                          |
| <i>ACTN2</i>   | Dilated cardiomyopathy<br>Hypertrophic cardiomyopathy                                                                          | 102573     | AD                          |
| <i>ACVRL1</i>  | Hereditary hemorrhagic telangiectasia<br>Pulmonary hypertension                                                                | 601284     | AD                          |
| <i>APC</i>     | Familial adenomatous polyposis (FAP) and attenuated FAP                                                                        | 611731     | AD                          |
| <i>APOB</i>    | Familial hypercholesterolemia<br>Familial hypobetalipoproteinemia                                                              | 107730     | AD, AR                      |
| <i>ATM</i>     | <i>ATM</i> -related cancers                                                                                                    | 607585     | AD, AR                      |
| <i>ATP7B</i>   | Wilson disease                                                                                                                 | 606882     | AR                          |
| <i>AXIN2</i>   | Oligodontia-colorectal cancer syndrome                                                                                         | 604025     | AD                          |
| <i>BAG3</i>    | Dilated cardiomyopathy<br>Myofibrillar myopathy                                                                                | 603883     | AD                          |
| <i>BAP1</i>    | <i>BAP1</i> tumor predisposition syndrome                                                                                      | 603089     | AD                          |
| <i>BARD1</i>   | <i>BARD1</i> -related cancers                                                                                                  | 601593     | AD                          |
| <i>BMPRIA</i>  | Juvenile polyposis syndrome                                                                                                    | 601299     | AD                          |
| <i>BMPR2</i>   | Pulmonary arterial hypertension                                                                                                | 600799     | AD                          |
| <i>BRCA1</i>   | Hereditary breast and ovarian cancer syndrome<br>Fanconi anemia                                                                | 113705     | AD, AR                      |
| <i>BRCA2</i>   | Hereditary breast and ovarian cancer syndrome<br>Fanconi anemia                                                                | 600185     | AD, AR                      |
| <i>BRIP1</i>   | <i>BRIP1</i> -related cancers<br>Fanconi anemia                                                                                | 605882     | AD, AR                      |
| <i>CACNA1C</i> | Brugada syndrome<br>Short QT syndrome<br>Timothy syndrome                                                                      | 114205     | AD                          |
| <i>CACNA1S</i> | Hypokalemic periodic paralysis<br>Malignant hyperthermia susceptibility                                                        | 114208     | AD                          |
| <i>CACNB2</i>  | Brugada syndrome<br>Short QT syndrome                                                                                          | 600003     | AD                          |
| <i>CALM1</i>   | Catecholaminergic polymorphic ventricular tachycardia<br>Long QT syndrome                                                      | 114180     | AD                          |
| <i>CALM2</i>   | Catecholaminergic polymorphic ventricular tachycardia<br>Long QT syndrome                                                      | 114182     | AD                          |
| <i>CALM3</i>   | Catecholaminergic polymorphic ventricular tachycardia<br>Long QT syndrome                                                      | 114183     | AD                          |
| <i>CASQ2</i>   | Catecholaminergic polymorphic ventricular tachycardia                                                                          | 114251     | AR                          |
| <i>CAVI</i>    | Pulmonary arterial hypertension                                                                                                | 601047     | AD                          |
| <i>CAV3</i>    | <i>CAV3</i> -related neuromuscular conditions<br>Hypertrophic cardiomyopathy<br>Long QT syndrome                               | 601253     | AD                          |

|               |                                                                                                                                 |        |          |
|---------------|---------------------------------------------------------------------------------------------------------------------------------|--------|----------|
| <i>CDC73</i>  | Hyperparathyroidism-jaw tumor syndrome<br>Familial isolated hyperparathyroidism<br>Parathyroid carcinoma                        | 607393 | AD       |
| <i>CDH1</i>   | Hereditary diffuse gastric cancer syndrome                                                                                      | 192090 | AD       |
| <i>CDK4</i>   | Hereditary cutaneous melanoma                                                                                                   | 123829 | AD       |
| <i>CDKN2A</i> | Hereditary melanoma-pancreatic cancer syndrome                                                                                  | 600160 | AD       |
| <i>CHEK2</i>  | <i>CHEK2</i> -related cancers                                                                                                   | 604373 | AD       |
| <i>COL3A1</i> | Ehlers-Danlos syndrome, vascular type                                                                                           | 120180 | AD       |
| <i>CRYAB</i>  | Dilated cardiomyopathy<br>Myofibrillar myopathy                                                                                 | 123590 | AD, AR   |
| <i>CSRP3</i>  | Dilated cardiomyopathy<br>Hypertrophic cardiomyopathy                                                                           | 600824 | AD       |
| <i>DES</i>    | Dilated cardiomyopathy<br>Myofibrillar myopathy                                                                                 | 125660 | AD, AR   |
| <i>DICER1</i> | <i>DICER1</i> -related pleuropulmonary blastoma familial tumor<br>predisposition syndrome                                       | 606241 | AD       |
| <i>DMD</i>    | Becker muscular dystrophy<br>Dilated cardiomyopathy<br>Duchenne muscular dystrophy                                              | 300377 | X-linked |
| <i>DSC2</i>   | Arrhythmogenic right ventricular cardiomyopathy                                                                                 | 125645 | AD, AR   |
| <i>DSG2</i>   | Arrhythmogenic right ventricular cardiomyopathy<br>Dilated cardiomyopathy                                                       | 125671 | AD, AR   |
| <i>DSP</i>    | Arrhythmogenic right ventricular cardiomyopathy<br>Dilated cardiomyopathy                                                       | 125647 | AD, AR   |
| <i>EMD</i>    | Emery-Dreifuss muscular dystrophy                                                                                               | 300384 | X-linked |
| <i>ENG</i>    | Hereditary hemorrhagic telangiectasia                                                                                           | 131195 | AD       |
| <i>EPCAM</i>  | Lynch syndrome                                                                                                                  | 185535 | AD       |
| <i>F2</i>     | Hereditary thrombophilia                                                                                                        | 176930 | AD, AR   |
| <i>F5</i>     | Hereditary thrombophilia                                                                                                        | 612309 | AD, AR   |
| <i>F9</i>     | Hemophilia<br>Hereditary thrombophilia                                                                                          | 300746 | X-linked |
| <i>FBNI</i>   | <i>FBNI</i> -related conditions                                                                                                 | 134797 | AD       |
| <i>FH</i>     | Hereditary leiomyomatosis and renal cell cancer<br>Fumarase deficiency                                                          | 136850 | AD, AR   |
| <i>FHL1</i>   | Emery-Dreifuss muscular dystrophy<br>Hypertrophic cardiomyopathy<br>Reducing body myopathy                                      | 300163 | X-Linked |
| <i>FLCN</i>   | Birt-Hogg-Dubé syndrome                                                                                                         | 607273 | AD       |
| <i>FLNC</i>   | Dilated cardiomyopathy<br>Distal myopathy<br>Hypertrophic cardiomyopathy<br>Myofibrillar myopathy<br>Restrictive cardiomyopathy | 102565 | AD       |
| <i>GDF2</i>   | Hereditary hemorrhagic telangiectasia                                                                                           | 605120 | AD       |
| <i>GLA</i>    | Fabry disease                                                                                                                   | 300644 | X-linked |
| <i>GPD1L</i>  | Brugada syndrome                                                                                                                | 611778 | AD       |
| <i>GREM1</i>  | Hereditary mixed polyposis syndrome                                                                                             | 603054 | AD       |
| <i>HAMP</i>   | Hereditary hemochromatosis                                                                                                      | 606464 | AR       |

|                |                                                                                                                                |        |          |
|----------------|--------------------------------------------------------------------------------------------------------------------------------|--------|----------|
| <i>HCN4</i>    | Brugada syndrome<br>Left ventricular noncompaction cardiomyopathy<br>Sinus node dysfunction or bradycardia                     | 605206 | AD       |
| <i>HFE</i>     | Hereditary hemochromatosis                                                                                                     | 613609 | AR       |
| <i>HJV</i>     | Hereditary hemochromatosis                                                                                                     | 608374 | AR       |
| <i>HOXB13</i>  | Prostate cancer                                                                                                                | 604607 | AD       |
| <i>JUP</i>     | Arrhythmogenic right ventricular cardiomyopathy<br>Naxos disease                                                               | 173325 | AD, AR   |
| <i>KCNE1</i>   | Long QT syndrome<br>Jervell and Lange-Nielsen syndrome                                                                         | 176261 | AD, AR   |
| <i>KCNE2</i>   | Long QT syndrome                                                                                                               | 603796 | AD       |
| <i>KCNH2</i>   | Brugada syndrome<br>Long QT syndrome<br>Short QT syndrome                                                                      | 152427 | AD       |
| <i>KCNJ2</i>   | Andersen-Tawil syndrome<br>Catecholaminergic polymorphic ventricular tachycardia<br>Short QT syndrome                          | 600681 | AD       |
| <i>KCNQ1</i>   | Atrial fibrillation<br>Long QT syndrome<br>Short QT syndrome<br>Jervell and Lange-Nielsen syndrome                             | 607542 | AD, AR   |
| <i>KIT</i>     | Gastrointestinal stromal tumors                                                                                                | 164920 | AD       |
| <i>LAMP2</i>   | Danon disease                                                                                                                  | 309060 | X-linked |
| <i>LDLR</i>    | Familial hypercholesterolemia                                                                                                  | 606945 | AD, AR   |
| <i>LDLRAP1</i> | Familial hypercholesterolemia                                                                                                  | 605747 | AR       |
| <i>LMNA</i>    | Congenital muscular dystrophy<br>Dilated cardiomyopathy<br>Emery-Dreifuss muscular dystrophy<br>Limb-girdle muscular dystrophy | 150330 | AD, AR   |
| <i>MAX</i>     | Hereditary paraganglioma-pheochromocytoma syndrome                                                                             | 154950 | AD       |
| <i>MEN1</i>    | Multiple endocrine neoplasia type 1                                                                                            | 613733 | AD       |
| <i>MET</i>     | Hereditary papillary renal cell carcinoma                                                                                      | 164860 | AD       |
| <i>MITF</i>    | Hereditary cutaneous malignant melanoma                                                                                        | 156845 | AD       |
| <i>MLH1</i>    | Lynch syndrome<br>Constitutional mismatch repair deficiency syndrome                                                           | 120436 | AD, AR   |
| <i>MSH2</i>    | Lynch syndrome<br>Constitutional mismatch repair deficiency syndrome                                                           | 609309 | AD, AR   |
| <i>MSH3</i>    | <i>MSH3</i> -associated polyposis                                                                                              | 600887 | AR       |
| <i>MSH6</i>    | Lynch syndrome<br>Constitutional mismatch repair deficiency syndrome                                                           | 600678 | AD, AR   |
| <i>MUTYH</i>   | <i>MUTYH</i> -associated polyposis                                                                                             | 604933 | AR       |
| <i>MYBPC3</i>  | Dilated cardiomyopathy<br>Hypertrophic cardiomyopathy<br>Left ventricular noncompaction cardiomyopathy                         | 600958 | AD       |
| <i>MYH11</i>   | Thoracic aortic aneurysms and dissections                                                                                      | 160745 | AD       |

|                |                                                                                                                                 |         |          |
|----------------|---------------------------------------------------------------------------------------------------------------------------------|---------|----------|
|                | Dilated cardiomyopathy<br>Hypertrophic cardiomyopathy<br>Laing distal myopathy<br>Left ventricular noncompaction cardiomyopathy |         |          |
| <i>MYH7</i>    | Myosin storage myopathy                                                                                                         | 160760  | AD, AR   |
| <i>MYL2</i>    | Hypertrophic cardiomyopathy                                                                                                     | 160781  | AD       |
| <i>MYL3</i>    | Hypertrophic cardiomyopathy<br>Restrictive cardiomyopathy                                                                       | 160790  | AD, AR   |
| <i>MYLK</i>    | Thoracic aortic aneurysms and dissections                                                                                       | 600922  | AD       |
| <i>NBN</i>     | <i>NBN</i> -related cancers<br>Nijmegen breakage syndrome                                                                       | 602667  | AD, AR   |
| <i>NF1</i>     | Neurofibromatosis type 1<br>Neurofibromatosis-Noonan syndrome<br>Watson syndrome                                                | 613113  | AD       |
| <i>NF2</i>     | Neurofibromatosis type 2                                                                                                        | 607379  | AD       |
| <i>NKX2-5</i>  | <i>NKX2-5</i> related cardiovascular conditions                                                                                 | 600584  | AD       |
| <i>NTHL1</i>   | <i>NTHL1</i> -associated polyposis                                                                                              | 602656  | AR       |
| <i>OTC</i>     | Ornithine transcarbamylase deficiency                                                                                           | 300461  | X-linked |
| <i>PALB2</i>   | <i>PALB2</i> -related cancers<br>Fanconi anemia                                                                                 | 610355  | AD, AR   |
| <i>PCSK9</i>   | Familial hypercholesterolemia                                                                                                   | 607786  | AD       |
| <i>PDGFRA</i>  | Gastrointestinal stromal tumors                                                                                                 | 173490  | AD       |
| <i>PKP2</i>    | Arrhythmogenic right ventricular cardiomyopathy<br>Brugada syndrome<br>Dilated cardiomyopathy                                   | 602861  | AD       |
| <i>PLN</i>     | Arrhythmogenic right ventricular cardiomyopathy<br>Dilated cardiomyopathy<br>Hypertrophic cardiomyopathy                        | 172405  | AD       |
| <i>PMS2</i>    | Lynch syndrome<br>Constitutional mismatch repair deficiency syndrome                                                            | 600259  | AD, AR   |
| <i>POLD1</i>   | <i>POLD1</i> -related cancers<br>Mandibular hypoplasia, deafness, progeroid features,<br>and lipodystrophy                      | 174761  | AD       |
| <i>POLE</i>    | <i>POLE</i> -related cancers<br>Facial dysmorphism, immunodeficiency, livedo, and short<br>stature (FILS) syndrome              | 174762  | AD, AR   |
| <i>PRKAG2</i>  | Hypertrophic cardiomyopathy<br>Wolff-Parkinson-White syndrome                                                                   | 602743  | AD       |
| <i>PRKARIA</i> | Carney complex                                                                                                                  | 1188830 | AD       |
| <i>PRKG1</i>   | Thoracic aortic aneurysms and dissections                                                                                       | 176894  | AD       |
| <i>PROC</i>    | Hereditary thrombophilia                                                                                                        | 612283  | AD, AR   |
| <i>PROS1</i>   | Hereditary thrombophilia                                                                                                        | 176880  | AD, AR   |
| <i>PTCH1</i>   | Basal cell nevus syndrome                                                                                                       | 601309  | AD       |
| <i>PTEN</i>    | <i>PTEN</i> hamartoma tumor syndrome                                                                                            | 601728  | AD       |
| <i>RAD51C</i>  | <i>RAD51C</i> -related cancers                                                                                                  | 602774  | AD       |
| <i>RAD51D</i>  | <i>RAD51D</i> -related cancers                                                                                                  | 602954  | AD       |
| <i>RBI</i>     | Retinoblastoma                                                                                                                  | 614041  | AD       |
| <i>RBM20</i>   | Dilated cardiomyopathy                                                                                                          | 613171  | AD       |

|                 |                                                                                                                                                           |        |        |
|-----------------|-----------------------------------------------------------------------------------------------------------------------------------------------------------|--------|--------|
| <i>RET</i>      | Multiple endocrine neoplasia type 2                                                                                                                       | 164761 | AD     |
| <i>RYR1</i>     | Central core disease<br>Centronuclear myopathy<br>Malignant hyperthermia susceptibility                                                                   | 180901 | AD, AR |
| <i>RYR2</i>     | Arrhythmogenic right ventricular cardiomyopathy<br>Catecholaminergic polymorphic ventricular tachycardia<br>Left ventricular noncompaction cardiomyopathy | 180902 | AD     |
| <i>SCN5A</i>    | Atrial fibrillation<br>Brugada syndrome<br>Dilated cardiomyopathy<br>Long QT syndrome                                                                     | 600163 | AD     |
| <i>SERPINA1</i> | Alpha-1 antitrypsin deficiency                                                                                                                            | 107400 | AR     |
| <i>SERPINC1</i> | Hereditary thrombophilia                                                                                                                                  | 107300 | AD, AR |
| <i>SDHA</i>     | Hereditary paraganglioma-pheochromocytoma syndrome<br>Gastrointestinal stromal tumors<br>Mitochondrial complex II deficiency                              | 600857 | AD, AR |
| <i>SDHAF2</i>   | Hereditary paraganglioma-pheochromocytoma syndrome                                                                                                        | 613019 | AD     |
| <i>SDHB</i>     | Hereditary paraganglioma-pheochromocytoma syndrome<br>Gastrointestinal stromal tumors<br>Renal cancer<br>Mitochondrial complex II deficiency              | 185470 | AD, AR |
| <i>SDHC</i>     | Hereditary paraganglioma-pheochromocytoma syndrome<br>Gastrointestinal stromal tumors<br>Renal cancer                                                     | 602413 | AD     |
| <i>SDHD</i>     | Hereditary paraganglioma-pheochromocytoma syndrome<br>Gastrointestinal stromal tumors                                                                     | 602690 | AD     |
| <i>SGCD</i>     | Limb-girdle muscular dystrophy                                                                                                                            | 601411 | AR     |
| <i>SLC40A1</i>  | Hereditary hemochromatosis                                                                                                                                | 604653 | AR     |
| <i>SMAD3</i>    | Loeys-Dietz syndrome<br>Thoracic aortic aneurysms and dissections                                                                                         | 603109 | AD     |
| <i>SMAD4</i>    | Hereditary hemorrhagic telangiectasia<br>Juvenile polyposis syndrome                                                                                      | 600993 | AD     |
| <i>SMARCA4</i>  | <i>SMARCA4</i> -related cancers                                                                                                                           | 603254 | AD     |
| <i>SMARCB1</i>  | Rhabdoid tumor predisposition syndrome<br>Schwannomatosis                                                                                                 | 601607 | AD     |
| <i>STK11</i>    | Peutz-Jeghers syndrome                                                                                                                                    | 602216 | AD     |
| <i>TCAP</i>     | Dilated cardiomyopathy<br>Limb-girdle muscular dystrophy                                                                                                  | 604488 | AD, AR |
| <i>TFR2</i>     | Hereditary hemochromatosis                                                                                                                                | 604720 | AR     |
| <i>TGFB2</i>    | Loeys-Dietz syndrome                                                                                                                                      | 190220 | AD     |
| <i>TGFB3</i>    | Arrhythmogenic right ventricular cardiomyopathy<br>Loeys-Dietz syndrome                                                                                   | 190230 | AD     |
| <i>TGFBR1</i>   | Loeys-Dietz syndrome<br>Thoracic aortic aneurysms and dissections<br>Multiple self-healing squamous epithelioma                                           | 190181 | AD     |
| <i>TGFBR2</i>   | Loeys-Dietz syndrome<br>Thoracic aortic aneurysms and dissections                                                                                         | 190182 | AD     |
| <i>TMEM127</i>  | Hereditary paraganglioma-pheochromocytoma syndrome                                                                                                        | 613403 | AD     |

|               |                                                                                                                                      |        |        |
|---------------|--------------------------------------------------------------------------------------------------------------------------------------|--------|--------|
| <i>TMEM43</i> | Arrhythmogenic right ventricular cardiomyopathy                                                                                      | 612048 | AD     |
| <i>TNNC1</i>  | Dilated cardiomyopathy<br>Hypertrophic cardiomyopathy                                                                                | 191040 | AD     |
| <i>TNNI3</i>  | Dilated cardiomyopathy<br>Hypertrophic cardiomyopathy<br>Restrictive cardiomyopathy                                                  | 191044 | AD     |
| <i>TNNT2</i>  | Dilated cardiomyopathy<br>Hypertrophic cardiomyopathy<br>Left ventricular noncompaction cardiomyopathy<br>Restrictive cardiomyopathy | 191045 | AD     |
| <i>TPM1</i>   | Dilated cardiomyopathy<br>Hypertrophic cardiomyopathy<br>Left ventricular noncompaction cardiomyopathy                               | 191010 | AD     |
| <i>VCL</i>    | Dilated cardiomyopathy                                                                                                               | 193065 | AD     |
| <i>TP53</i>   | Li-Fraumeni syndrome                                                                                                                 | 191170 | AD     |
| <i>TSC1</i>   | Tuberous sclerosis complex                                                                                                           | 605284 | AD     |
| <i>TSC2</i>   | Tuberous sclerosis complex                                                                                                           | 191092 | AD     |
| <i>VHL</i>    | Von Hippel-Lindau syndrome<br>Familial erythrocytosis, type 2                                                                        | 608537 | AD, AR |
| <i>WT1</i>    | <i>WT1</i> -related Wilms tumor                                                                                                      | 607102 | AD     |

AD = autosomal dominant; AR = autosomal recessive.\*Genes listed in this table may also have additional reported clinical associations outside of the conditions listed. Additional information about gene-condition associations can be found at <http://www.omim.org>
