# Supplementary material for: Physician-directed genetic screening to evaluate personal risk for medically actionable disorders: a large multi-center cohort study
Source: PubMed Central journal article supplement (PMC8371767; doi:10.1186/s12916-021-01999-2), 2021-08-18
Supplement: 12916_2021_1999_MOESM2_ESM.pdf [file 12916_2021_1999_MOESM2_ESM.pdf]

**Table S2. Clinically significant variants detected in this patient cohort. For further details related to the classification of each variant, see <https://www.ncbi.nlm.nih.gov/clinvar/>**

| Gene | Variant (HGVS)                  | Effect                 | Variant Type | Interpretation        |
|------|---------------------------------|------------------------|--------------|-----------------------|
| APC  | NM 000038.5:c.4733_4734del      | p.Cys1578Tyrfs         | indel        | Pathogenic            |
| APC  | NM 000038.5:c.1415dup           | p.Gln473Thrfs          | indel        | Pathogenic            |
| APC  | NM 000038.5:c.3920T>A           | p.Ile1307Lys           | substitution | Increased Risk Allele |
| APOB | NM 000384.2:c.6543del           | p.Phe2181Leuifs        | indel        | Pathogenic            |
| APOB | NM 000384.2:c.671del            | p.Pro224Hisfs          | indel        | Pathogenic            |
| APOB | NM 000384.2:c.7537C>T           | p.Arg2513*             | substitution | Pathogenic            |
| APOB | NM 000384.2:c.10580G>A          | p.Arg3527Gln           | substitution | Pathogenic            |
| APOB | NM 000384.2:c.10579C>T          | p.Arg3527Trp           | substitution | Pathogenic            |
| APOB | NM 000384.2:c.11764C>T          | p.Gln3922*             | substitution | Pathogenic            |
| APOB | NM 000384.2:c.11789-1G>C        | Splice site            | substitution | Likely Pathogenic     |
| ATM  | NM 000051.3:c.5675-?_5762+?del  | Deletion (Exon 38)     | cnv          | Pathogenic            |
| ATM  | NM 000051.3:c.8851-?_*3591+?del | Deletion (Exons 62-63) | cnv          | Pathogenic            |
| ATM  | NM 000051.3:c.7517_7520del      | p.Arg2506Thrfs         | indel        | Pathogenic            |
| ATM  | NM 000051.3:c.7638_7646del      | p.Arg2547_Ser2549del   | indel        | Pathogenic            |
| ATM  | NM 000051.3:c.4683_4689del      | p.Asp1563Phefs         | indel        | Pathogenic            |
| ATM  | NM 000051.3:c.7010_7011del      | p.Cys2337Serfs         | indel        | Pathogenic            |
| ATM  | NM 000051.3:c.8823_8824del      | p.Gln2942Glyfs         | indel        | Pathogenic            |
| ATM  | NM 000051.3:c.1027_1030del      | p.Glu343Ilefs          | indel        | Pathogenic            |
| ATM  | NM 000051.3:c.1564_1565del      | p.Glu522Ilefs          | indel        | Pathogenic            |
| ATM  | NM 000051.3:c.7886_7890del      | p.Ile2629Serfs         | indel        | Pathogenic            |
| ATM  | NM 000051.3:c.6228del           | p.Leu2077Phefs         | indel        | Pathogenic            |
| ATM  | NM 000051.3:c.7669_7670del      | p.Leu2557Valfs         | indel        | Pathogenic            |
| ATM  | NM 000051.3:c.2284_2285del      | p.Leu762Valfs          | indel        | Pathogenic            |
| ATM  | NM 000051.3:c.8432del           | p.Lys2811Serfs         | indel        | Pathogenic            |
| ATM  | NM 000051.3:c.5894_5900dup      | p.Met1967Ilefs         | indel        | Pathogenic            |
| ATM  | NM 000051.3:c.2838del           | p.Met946Ilefs          | indel        | Pathogenic            |
| ATM  | NM 000051.3:c.5631_5635delinsA  | p.Phe1877Leuifs        | indel        | Pathogenic            |
| ATM  | NM 000051.3:c.1597_1600dup      | p.Pro534Glnfs          | indel        | Pathogenic            |
| ATM  | NM 000051.3:c.6997dup           | p.Thr2333Asnfs         | indel        | Pathogenic            |
| ATM  | NM 000051.3:c.1355del           | p.Thr452Asnfs          | indel        | Pathogenic            |
| ATM  | NM 000051.3:c.7542_7543delTA    | p.Tyr2514*             | indel        | Pathogenic            |
| ATM  | NM 000051.3:c.3802del           | p.Val1268*             | indel        | Pathogenic            |
| ATM  | NM 000051.3:c.381delA           | p.Val128*              | indel        | Pathogenic            |
| ATM  | NM 000051.3:c.4804_4805del      | p.Val1602Leuifs        | indel        | Pathogenic            |
| ATM  | NM 000051.3:c.1997del           | p.Val666Glyfs          | indel        | Pathogenic            |
| ATM  | NM 000051.3:c.5177+5G>A         | Intronic               | substitution | Likely Pathogenic     |
| ATM  | NM 000051.3:c.5763-1050A>G      | Intronic               | substitution | Pathogenic            |
| ATM  | NM 000051.3:c.5825C>T           | p.Ala1942Val           | substitution | Pathogenic            |
| ATM  | NM 000051.3:c.4396C>T           | p.Arg1466*             | substitution | Pathogenic            |
| ATM  | NM 000051.3:c.5623C>T           | p.Arg1875*             | substitution | Pathogenic            |
| ATM  | NM 000051.3:c.67C>T             | p.Arg23*               | substitution | Pathogenic            |
| ATM  | NM 000051.3:c.8977C>T           | p.Arg2993*             | substitution | Pathogenic            |
| ATM  | NM 000051.3:c.103C>T            | p.Arg35*               | substitution | Pathogenic            |
| ATM  | NM 000051.3:c.5515C>T           | p.Gln1839*             | substitution | Pathogenic            |
| ATM  | NM 000051.3:c.2341C>T           | p.Gln781*              | substitution | Pathogenic            |
| ATM  | NM 000051.3:c.5932G>T           | p.Glu1978*             | substitution | Pathogenic            |
| ATM  | NM 000051.3:c.6115G>A           | p.Glu2039Lys           | substitution | Likely Pathogenic     |
| ATM  | NM 000051.3:c.841G>T            | p.Glu281*              | substitution | Pathogenic            |
| ATM  | NM 000051.3:c.967A>G            | p.Ile323Val            | substitution | Pathogenic            |
| ATM  | NM 000051.3:c.8549T>A           | p.Leu2850*             | substitution | Pathogenic            |
| ATM  | NM 000051.3:c.2849T>G           | p.Leu950Arg            | substitution | Likely Pathogenic     |
| ATM  | NM 000051.3:c.5890A>T           | p.Lys1964*             | substitution | Pathogenic            |
| ATM  | NM 000051.3:c.8266A>T           | p.Lys2756*             | substitution | Pathogenic            |
| ATM  | NM 000051.3:c.875C>T            | p.Pro292Leu            | substitution | Pathogenic            |
| ATM  | NM 000051.3:c.5228C>T           | p.Thr1743Ile           | substitution | Likely Pathogenic     |
| ATM  | NM 000051.3:c.8879G>A           | p.Trp2960*             | substitution | Pathogenic            |
| ATM  | NM 000051.3:c.6258T>G           | p.Tyr2086*             | substitution | Pathogenic            |

|              |                                 |                                |              |                   |
|--------------|---------------------------------|--------------------------------|--------------|-------------------|
| <i>ATM</i>   | NM 000051.3:c.7271T>G           | p.Val2424Gly                   | substitution | Pathogenic        |
| <i>ATM</i>   | NM 000051.3:c.8419-2A>G         | Splice site                    | substitution | Likely Pathogenic |
| <i>ATM</i>   | NM 000051.3:c.8786+1G>A         | Splice site                    | substitution | Pathogenic        |
| <i>ATM</i>   | NM 000051.3:c.5006-1G>A         | Splice site                    | substitution | Likely Pathogenic |
| <i>ATM</i>   | NM 000051.3:c.2921+1G>A         | Splice site                    | substitution | Pathogenic        |
| <i>ATM</i>   | NM 000051.3:c.186-2A>G          | Splice site                    | substitution | Likely Pathogenic |
| <i>ATM</i>   | NM 000051.3:c.5497-2A>C         | Splice site                    | substitution | Pathogenic        |
| <i>ATP7B</i> | NM 000053.3:c.-157-? 51+?del    | Deletion (Exon 1)              | cnv          | Pathogenic        |
| <i>ATP7B</i> | NM 000053.3:c.3402del           | p.Ala1135Glnfs                 | indel        | Pathogenic        |
| <i>ATP7B</i> | NM 000053.3:c.19 20del          | p.Gln7Aspfs                    | indel        | Pathogenic        |
| <i>ATP7B</i> | NM 000053.3:c.1745 1746del      | p.Ile582Argfs                  | indel        | Pathogenic        |
| <i>ATP7B</i> | NM 000053.3:c.2304dup           | p.Met769Hisfs                  | indel        | Pathogenic        |
| <i>ATP7B</i> | NM 000053.3:c.2781del           | p.Phe927Leufs                  | indel        | Pathogenic        |
| <i>ATP7B</i> | NM 000053.3:c.956del            | p.Pro319Hisfs                  | indel        | Pathogenic        |
| <i>ATP7B</i> | NM 000053.3:c.2009 2015del      | p.Tyr670*                      | indel        | Pathogenic        |
| <i>ATP7B</i> | NM 000053.3:c.3649 3654del      | p.Val1217 Leu1218del           | indel        | Likely Pathogenic |
| <i>ATP7B</i> | NM 000053.3:c.2532del           | p.Val845Serfs                  | indel        | Pathogenic        |
| <i>ATP7B</i> | NM 000053.3:c.51+4A>T           | Intronic                       | substitution | Pathogenic        |
| <i>ATP7B</i> | NM 000053.3:c.2122-3C>T         | Intronic                       | substitution | Likely Pathogenic |
| <i>ATP7B</i> | NM 000053.3:c.-676A>G           | Non-coding                     | substitution | Likely Pathogenic |
| <i>ATP7B</i> | NM 000053.3:c.3007G>A           | p.Ala1003Thr                   | substitution | Pathogenic        |
| <i>ATP7B</i> | NM 000053.3:c.3451C>T           | p.Arg1151Cys                   | substitution | Likely Pathogenic |
| <i>ATP7B</i> | NM 000053.3:c.3955C>T           | p.Arg1319*                     | substitution | Pathogenic        |
| <i>ATP7B</i> | NM 000053.3:c.1847G>A           | p.Arg616Gln                    | substitution | Pathogenic        |
| <i>ATP7B</i> | NM 000053.3:c.2333G>T           | p.Arg778Leu                    | substitution | Pathogenic        |
| <i>ATP7B</i> | NM 000053.3:c.122A>G            | p.Asn41Ser                     | substitution | Pathogenic        |
| <i>ATP7B</i> | NM 000053.3:c.3191A>C           | p.Glu1064Ala                   | substitution | Pathogenic        |
| <i>ATP7B</i> | NM 000053.3:c.3517G>A           | p.Glu1173Lys                   | substitution | Pathogenic        |
| <i>ATP7B</i> | NM 000053.3:c.3796G>A           | p.Gly1266Arg                   | substitution | Pathogenic        |
| <i>ATP7B</i> | NM 000053.3:c.2071G>A           | p.Gly691Arg                    | substitution | Pathogenic        |
| <i>ATP7B</i> | NM 000053.3:c.2128G>A           | p.Gly710Ser                    | substitution | Pathogenic        |
| <i>ATP7B</i> | NM 000053.3:c.2605G>A           | p.Gly869Arg                    | substitution | Likely Pathogenic |
| <i>ATP7B</i> | NM 000053.3:c.3207C>A           | p.His1069Gln                   | substitution | Pathogenic        |
| <i>ATP7B</i> | NM 000053.3:c.2383C>T           | p.Leu795Phe                    | substitution | Pathogenic        |
| <i>ATP7B</i> | NM 000053.3:c.1934T>G           | p.Met645Arg                    | substitution | Pathogenic        |
| <i>ATP7B</i> | NM 000053.3:c.2305A>G           | p.Met769Val                    | substitution | Pathogenic        |
| <i>ATP7B</i> | NM 000053.3:c.2975C>T           | p.Pro992Leu                    | substitution | Pathogenic        |
| <i>ATP7B</i> | NM 000053.3:c.4088C>T           | p.Ser1363Phe                   | substitution | Pathogenic        |
| <i>ATP7B</i> | NM 000053.3:c.2924C>A           | p.Ser975Tyr                    | substitution | Pathogenic        |
| <i>ATP7B</i> | NM 000053.3:c.4058G>A           | p.Trp1353*                     | substitution | Pathogenic        |
| <i>ATP7B</i> | NM 000053.3:c.3316G>A           | p.Val1106Ile                   | substitution | Pathogenic        |
| <i>ATP7B</i> | NM 000053.3:c.2668G>A           | p.Val890Met                    | substitution | Likely Pathogenic |
| <i>AXIN2</i> | NM 004655.3:c.1908-2A>G         | Splice site                    | substitution | Likely Pathogenic |
| <i>BAP1</i>  | NM 004656.3:c.1383dup           | p.Pro462Serfs                  | indel        | Pathogenic        |
| <i>BAP1</i>  | NM 004656.3:c.783+2T>C          | Splice site                    | substitution | Likely Pathogenic |
| <i>BARD1</i> | NM 000465.3:c.1315-? 1568+?del  | Deletion (Exons 5-6)           | cnv          | Pathogenic        |
| <i>BARD1</i> | NM 000465.3:c.1904-3360 2020del | Partial Deletion (Exons 10-11) | cnv          | Likely Pathogenic |
| <i>BARD1</i> | NM 000465.3:c.1865 1903+274del  | Partial Deletion (Exon 9)      | cnv          | Likely Pathogenic |
| <i>BARD1</i> | NM 000465.3:c.69 70delins25     | p.Ala25Glyfs                   | indel        | Pathogenic        |
| <i>BARD1</i> | NM 000465.3:c.2229dup           | p.Asn744*                      | indel        | Likely Pathogenic |
| <i>BARD1</i> | NM 000465.3:c.176 177del        | p.Glu59Alafs                   | indel        | Pathogenic        |
| <i>BARD1</i> | NM 000465.3:c.1935 1954dup      | p.Glu652Valfs                  | indel        | Pathogenic        |
| <i>BARD1</i> | NM 000465.3:c.1996C>T           | p.Gln666*                      | substitution | Likely Pathogenic |
| <i>BARD1</i> | NM 000465.3:c.1212C>G           | p.Tyr404*                      | substitution | Pathogenic        |
| <i>BRCA1</i> | NM 007294.3:c.5333-? 5406+?del  | Deletion (Exon 21)             | cnv          | Pathogenic        |
| <i>BRCA1</i> | NM 007294.3:c.-232-? 5467+?del  | Deletion (Exons 1-22)          | cnv          | Pathogenic        |
| <i>BRCA1</i> | NM 007294.3:c.4186-? 4675+?del  | Deletion (Exons 12-14)         | cnv          | Pathogenic        |
| <i>BRCA1</i> | NM 007294.3:c.4358-? 5277+?del  | Deletion (Exons 13-19)         | cnv          | Pathogenic        |
| <i>BRCA1</i> | NM 007294.3:c.548-? 4185+?del   | Deletion (Exons 8-11)          | cnv          | Pathogenic        |
| <i>BRCA1</i> | NM 007294.3:c.4186-? 4357+?dup  | Gain (Exon 12)                 | cnv          | Pathogenic        |
| <i>BRCA1</i> | NM 007294.3:c.2071del           | p.Arg691Aspfs                  | indel        | Pathogenic        |

|              |                                 |                   |              |                   |
|--------------|---------------------------------|-------------------|--------------|-------------------|
| <i>BRCA1</i> | NM 007294.3:c.2989 2990dup      | p.Asn997Lysfs     | indel        | Pathogenic        |
| <i>BRCA1</i> | NM 007294.3:c.3485del           | p.Asp1162Valfs    | indel        | Pathogenic        |
| <i>BRCA1</i> | NM 007294.3:c.676del            | p.Cys226Valfs     | indel        | Pathogenic        |
| <i>BRCA1</i> | NM 007294.3:c.3331 3334del      | p.Gln1111Asnfs    | indel        | Pathogenic        |
| <i>BRCA1</i> | NM 007294.3:c.5266dupC          | p.Gln1756Profs    | indel        | Pathogenic        |
| <i>BRCA1</i> | NM 007294.3:c.4035del           | p.Glu1346Lysfs    | indel        | Pathogenic        |
| <i>BRCA1</i> | NM 007294.3:c.66dup             | p.Glu23Argfs      | indel        | Pathogenic        |
| <i>BRCA1</i> | NM 007294.3:c.68 69delAG        | p.Glu23Valfs      | indel        | Pathogenic        |
| <i>BRCA1</i> | NM 007294.3:c.3228 3229del      | p.Gly1077Alafs    | indel        | Pathogenic        |
| <i>BRCA1</i> | NM 007294.3:c.2517 2518del      | p.His839Glnfs     | indel        | Pathogenic        |
| <i>BRCA1</i> | NM 007294.3:c.5470 5477del      | p.Ile1824Aspfs    | indel        | Pathogenic        |
| <i>BRCA1</i> | NM 007294.3:c.432 433del        | p.Pro145Phefs     | indel        | Pathogenic        |
| <i>BRCA1</i> | NM 007294.3:c.2926 2941dup      | p.Pro981Glnfs     | indel        | Pathogenic        |
| <i>BRCA1</i> | NM 007294.3:c.2865del           | p.Ser956Leufs     | indel        | Pathogenic        |
| <i>BRCA1</i> | NM 007294.3:c.1961dup           | p.Tyr655Valfs     | indel        | Pathogenic        |
| <i>BRCA1</i> | NM 007294.3:c.697 698del        | p.Val233Asnfs     | indel        | Pathogenic        |
| <i>BRCA1</i> | NM 007294.3:c.2T>C              | Initiator codon   | substitution | Pathogenic        |
| <i>BRCA1</i> | NM 007294.3:c.5503C>T           | p.Arg1835*        | substitution | Pathogenic        |
| <i>BRCA1</i> | NM 007294.3:c.191G>A            | p.Cys64Tyr        | substitution | Pathogenic        |
| <i>BRCA1</i> | NM 007294.3:c.1687C>T           | p.Gln563*         | substitution | Pathogenic        |
| <i>BRCA1</i> | NM 007294.3:c.4057G>T           | p.Glu1353*        | substitution | Pathogenic        |
| <i>BRCA1</i> | NM 007294.3:c.427G>T            | p.Glu143*         | substitution | Pathogenic        |
| <i>BRCA1</i> | NM 007294.3:c.5117G>A           | p.Gly1706Glu      | substitution | Pathogenic        |
| <i>BRCA1</i> | NM 007294.3:c.4508C>A           | p.Ser1503*        | substitution | Pathogenic        |
| <i>BRCA1</i> | NM 007294.3:c.5346G>A           | p.Trp1782*        | substitution | Pathogenic        |
| <i>BRCA1</i> | NM 007294.3:c.5152+1G>T         | Splice site       | substitution | Pathogenic        |
| <i>BRCA1</i> | NM 007294.3:c.4485-1G>A         | Splice site       | substitution | Likely Pathogenic |
| <i>BRCA1</i> | NM 007294.3:c.5277+1G>A         | Splice site       | substitution | Pathogenic        |
| <i>BRCA2</i> | NM 007294.3:c.425+415 4780dup   | Gain (Exons 5-11) | cnv          | Pathogenic        |
| <i>BRCA2</i> | NM 000059.3:c.2808 2811del      | p.Ala938Profs     | indel        | Pathogenic        |
| <i>BRCA2</i> | NM 000059.3:c.5238dup           | p.Asn1747*        | indel        | Pathogenic        |
| <i>BRCA2</i> | NM 000059.3:c.5350 5351del      | p.Asn1784Hisfs    | indel        | Pathogenic        |
| <i>BRCA2</i> | NM 000059.3:c.6408 6414del      | p.Asn2137Lysfs    | indel        | Pathogenic        |
| <i>BRCA2</i> | NM 000059.3:c.1265del           | p.Asn422Ilefs     | indel        | Pathogenic        |
| <i>BRCA2</i> | NM 000059.3:c.2836 2837del      | p.Asp946Phefs     | indel        | Pathogenic        |
| <i>BRCA2</i> | NM 000059.3:c.9699 9702del      | p.Cys3233Trpfs    | indel        | Pathogenic        |
| <i>BRCA2</i> | NM 000059.3:c.4284dup           | p.Gln1429Serfs    | indel        | Pathogenic        |
| <i>BRCA2</i> | NM 000059.3:c.6024dup           | p.Gln2009Alafs    | indel        | Pathogenic        |
| <i>BRCA2</i> | NM 000059.3:c.6468 6469del      | p.Gln2157Ilefs    | indel        | Pathogenic        |
| <i>BRCA2</i> | NM 000059.3:c.9891 9894dup      | p.Gln3299Ilefs    | indel        | Pathogenic        |
| <i>BRCA2</i> | NM 000059.3:c.5722 5723del      | p.Leu1908Argfs    | indel        | Pathogenic        |
| <i>BRCA2</i> | NM 000059.3:c.6275 6276del      | p.Leu2092Profs    | indel        | Pathogenic        |
| <i>BRCA2</i> | NM 000059.3:c.6757 6758del      | p.Leu2253Phefs    | indel        | Pathogenic        |
| <i>BRCA2</i> | NM 000059.3:c.3170 3174delAGAAA | p.Lys1057Thrfs    | indel        | Pathogenic        |
| <i>BRCA2</i> | NM 000059.3:c.469 470delAA      | p.Lys157Valfs     | indel        | Pathogenic        |
| <i>BRCA2</i> | NM 000059.3:c.6486 6489del      | p.Lys2162Asnfs    | indel        | Pathogenic        |
| <i>BRCA2</i> | NM 000059.3:c.3545 3546del      | p.Phe1182*        | indel        | Pathogenic        |
| <i>BRCA2</i> | NM 000059.3:c.2672dup           | p.Phe892Leufs     | indel        | Pathogenic        |
| <i>BRCA2</i> | NM 000059.3:c.6998dup           | p.Pro2334Thrfs    | indel        | Pathogenic        |
| <i>BRCA2</i> | NM 000059.3:c.3744 3747del      | p.Ser1248Argfs    | indel        | Pathogenic        |
| <i>BRCA2</i> | NM 000059.3:c.5828del           | p.Ser1943Leufs    | indel        | Pathogenic        |
| <i>BRCA2</i> | NM 000059.3:c.5946delT          | p.Ser1982Argfs    | indel        | Pathogenic        |
| <i>BRCA2</i> | NM 000059.3:c.3199del           | p.Thr1067Leufs    | indel        | Pathogenic        |
| <i>BRCA2</i> | NM 000059.3:c.4133 4136del      | p.Thr1378Argfs    | indel        | Pathogenic        |
| <i>BRCA2</i> | NM 000059.3:c.9097dup           | p.Thr3033Asnfs    | indel        | Pathogenic        |
| <i>BRCA2</i> | NM 000059.3:c.9253dup           | p.Thr3085Asnfs    | indel        | Pathogenic        |
| <i>BRCA2</i> | NM 000059.3:c.2716dup           | p.Thr906Asnfs     | indel        | Pathogenic        |
| <i>BRCA2</i> | NM 000059.3:c.5130 5133del      | p.Tyr1710*        | indel        | Pathogenic        |
| <i>BRCA2</i> | NM 000059.3:c.6641dup           | p.Tyr2215Leufs    | indel        | Pathogenic        |
| <i>BRCA2</i> | NM 000059.3:c.3847 3848del      | p.Val1283Lysfs    | indel        | Pathogenic        |
| <i>BRCA2</i> | NM 000059.3:c.156 157insAlu     | Splicing          | indel        | Pathogenic        |

|                          |                               |                       |              |                   |
|--------------------------|-------------------------------|-----------------------|--------------|-------------------|
| <i>BRCA2</i>             | NM 000059.3:c.3G>A            | Initiator codon       | substitution | Pathogenic        |
| <i>BRCA2</i>             | NM 000059.3:c.7007G>A         | p.Arg2336His          | substitution | Pathogenic        |
| <i>BRCA2</i>             | NM 000059.3:c.7007G>C         | p.Arg2336Pro          | substitution | Pathogenic        |
| <i>BRCA2</i>             | NM 000059.3:c.7976G>A         | p.Arg2659Lys          | substitution | Pathogenic        |
| <i>BRCA2</i>             | NM 000059.3:c.5864C>A         | p.Ser1955*            | substitution | Pathogenic        |
| <i>BRCA2</i>             | NM 000059.3:c.1103C>A         | p.Ser368*             | substitution | Pathogenic        |
| <i>BRCA2</i>             | NM 000059.3:c.8909G>A         | p.Trp2970*            | substitution | Pathogenic        |
| <i>BRCA2</i>             | NM 000059.3:c.5286T>G         | p.Tyr1762*            | substitution | Pathogenic        |
| <i>BRCA2</i>             | NM 000059.3:c.8488-1G>A       | Splice site           | substitution | Likely Pathogenic |
| <i>BRCA2</i>             | NM 000059.3:c.-39-1G>C        | Splice site           | substitution | Likely Pathogenic |
| <i>BRIP1</i>             | NM 032043.2:c.2010dup         | p.Glu671*             | indel        | Pathogenic        |
| <i>BRIP1</i>             | NM 032043.2:c.1442_1443dup    | p.Ile482Valfs         | indel        | Pathogenic        |
| <i>BRIP1</i>             | NM 032043.2:c.1510dup         | p.Ile504Asnfs         | indel        | Pathogenic        |
| <i>BRIP1</i>             | NM 032043.2:c.2992_2995del    | p.Lys998Glufs         | indel        | Pathogenic        |
| <i>BRIP1</i>             | NM 032043.2:c.3401del         | p.Pro1134Leufs        | indel        | Likely Pathogenic |
| <i>BRIP1</i>             | NM 032043.2:c.1853_1854insG   | p.Pro619Thrfs         | indel        | Pathogenic        |
| <i>BRIP1</i>             | NM 032043.2:c.2684_2687del    | p.Ser895*             | indel        | Pathogenic        |
| <i>BRIP1</i>             | NM 032043.2:c.1045G>C         | p.Ala349Pro           | substitution | Likely Pathogenic |
| <i>BRIP1</i>             | NM 032043.2:c.1315C>T         | p.Arg439*             | substitution | Pathogenic        |
| <i>BRIP1</i>             | NM 032043.2:c.2392C>T         | p.Arg798*             | substitution | Pathogenic        |
| <i>BRIP1</i>             | NM 032043.2:c.1372G>T         | p.Glu458*             | substitution | Pathogenic        |
| <i>BRIP1</i>             | NM 032043.2:c.161T>G          | p.Leu54*              | substitution | Pathogenic        |
| <i>BRIP1</i>             | NM 032043.2:c.3167C>G         | p.Ser1056*            | substitution | Likely Pathogenic |
| <i>BRIP1</i>             | NM 032043.2:c.1694C>A         | p.Ser565*             | substitution | Pathogenic        |
| <i>BRIP1</i>             | NM 032043.2:c.1343G>A         | p.Trp448*             | substitution | Pathogenic        |
| <i>BRIP1</i>             | NM 032043.2:c.2400C>G         | p.Tyr800*             | substitution | Pathogenic        |
| <i>BRIP1</i>             | NM 032043.2:c.1340+1G>A       | Splice site           | substitution | Likely Pathogenic |
| <i>CACNAIS</i>           | NM 000069.2:c.5227-2del       | Splice site           | indel        | Likely Pathogenic |
| <i>CACNAIS</i>           | NM 000069.2:c.19C>T           | p.Gln7*               | substitution | Pathogenic        |
| <i>CACNAIS</i>           | NM 000069.2:c.1948+1G>A       | Splice site           | substitution | Likely Pathogenic |
| <i>CACNAIS</i>           | NM 000069.2:c.4442-2A>G       | Splice site           | substitution | Likely Pathogenic |
| <i>CACNAIS</i>           | NM 000069.2:c.2854-2A>C       | Splice site           | substitution | Likely Pathogenic |
| <i>CACNAIS</i>           | NM 000069.2:c.3525+1G>A       | Splice site           | substitution | Likely Pathogenic |
| <i>CASQ2</i>             | NM 001232.3:c.475G>T          | p.Glu159*             | substitution | Pathogenic        |
| <i>CASQ2</i>             | NM 001232.3:c.856G>T          | p.Glu286*             | substitution | Pathogenic        |
| <i>CAV3</i>              | NM 033337.2:c.277G>A          | p.Ala93Thr            | substitution | Pathogenic        |
| <i>CAV3</i>              | NM 033337.2:c.294C>A          | p.Cys98*              | substitution | Likely Pathogenic |
| <i>CDH1</i>              | NM 004360.3:c.1973dup         | p.Leu658Phefs         | indel        | Pathogenic        |
| <i>CDH1</i>              | NM 004360.3:c.2287G>T         | p.Glu763*             | substitution | Pathogenic        |
| <i>CDKN2A (p16INK4a)</i> | NM 000077.4:c.225_243del      | p.Ala76Cysfs          | indel        | Pathogenic        |
| <i>CDKN2A (p16INK4a)</i> | NM 000077.4:c.335_337dup      | p.Arg112dup           | indel        | Likely Pathogenic |
| <i>CDKN2A (p16INK4a)</i> | NM 000077.4:c.189del          | p.Leu64Cysfs          | indel        | Pathogenic        |
| <i>CDKN2A (p16INK4a)</i> | NM 000077.4:c.176T>G          | p.Val59Gly            | substitution | Pathogenic        |
| <i>CHEK2</i>             | NM 007194.3:c.-6-?_319+?del   | Deletion (Exon 2)     | cnv          | Pathogenic        |
| <i>CHEK2</i>             | NM 007194.3:c.909-?_1095+?del | Deletion (Exons 9-10) | cnv          | Pathogenic        |
| <i>CHEK2</i>             | NM 007194.3:c.847-?_908+?dup  | Gain (Exon 8)         | cnv          | Likely Pathogenic |
| <i>CHEK2</i>             | NM 007194.3:c.320-?_592+?dup  | Gain (Exons 3-4)      | cnv          | Likely Pathogenic |
| <i>CHEK2</i>             | NM 007194.3:c.846+4_846+7del  | Intronic              | indel        | Likely Pathogenic |
| <i>CHEK2</i>             | NM 007194.3:c.655del          | p.Glu219Asnfs         | indel        | Pathogenic        |
| <i>CHEK2</i>             | NM 007194.3:c.1368dupA        | p.Glu457Argfs         | indel        | Pathogenic        |
| <i>CHEK2</i>             | NM 007194.3:c.1371_1372del    | p.Lys458Serfs         | indel        | Pathogenic        |
| <i>CHEK2</i>             | NM 007194.3:c.629_632del      | p.Ser210Phefs         | indel        | Pathogenic        |
| <i>CHEK2</i>             | NM 007194.3:c.1263delT        | p.Ser422Valfs         | indel        | Pathogenic        |
| <i>CHEK2</i>             | NM 007194.3:c.152_155dup      | p.Ser53Valfs          | indel        | Pathogenic        |
| <i>CHEK2</i>             | NM 007194.3:c.1100delC        | p.Thr367Metfs         | indel        | Pathogenic        |
| <i>CHEK2</i>             | NM 007194.3:c.277del          | p.Trp93Glyfs          | indel        | Pathogenic        |
| <i>CHEK2</i>             | NM 007194.3:c.1188del         | p.Val397Phefs         | indel        | Pathogenic        |
| <i>CHEK2</i>             | NM 007194.3:c.349A>G          | p.Arg117Gly           | substitution | Likely Pathogenic |
| <i>CHEK2</i>             | NM 007194.3:c.433C>T          | p.Arg145Trp           | substitution | Likely Pathogenic |
| <i>CHEK2</i>             | NM 007194.3:c.1555C>T         | p.Arg519*             | substitution | Likely Pathogenic |
| <i>CHEK2</i>             | NM 007194.3:c.190G>A          | p.Glu64Lys            | substitution | Likely Pathogenic |

|               |                                    |                                   |              |                             |
|---------------|------------------------------------|-----------------------------------|--------------|-----------------------------|
| <i>CHEK2</i>  | NM_007194.3:c.470T>C               | p.Ile157Thr                       | substitution | Pathogenic (low penetrance) |
| <i>CHEK2</i>  | NM_007194.3:c.707T>C               | p.Leu236Pro                       | substitution | Likely Pathogenic           |
| <i>CHEK2</i>  | NM_007194.3:c.1283C>T              | p.Ser428Phe                       | substitution | Pathogenic (low penetrance) |
| <i>CHEK2</i>  | NM_007194.3:c.1232G>A              | p.Trp411*                         | substitution | Pathogenic                  |
| <i>CHEK2</i>  | NM_007194.3:c.444+1G>A             | Splice site                       | substitution | Pathogenic                  |
| <i>CHEK2</i>  | NM_007194.3:c.908+2T>C             | Splice site                       | substitution | Likely Pathogenic           |
| <i>CHEK2</i>  | NM_007194.3:c.1462-1G>A            | Splice site                       | substitution | Likely Pathogenic           |
| <i>COL3A1</i> | NM_000090.3:c.2248G>C              | p.Gly750Arg                       | substitution | Likely Pathogenic           |
| <i>COL3A1</i> | NM_000090.3:c.852+2T>C             | Splice site                       | substitution | Likely Pathogenic           |
| <i>CRYAB</i>  | NM_001885.2:c.343del               | p.Ser115Profs                     | indel        | Pathogenic                  |
| <i>DES</i>    | NM_001927.3:c.-86-? *749+?del      | Deletion (Entire coding sequence) | cnv          | Pathogenic                  |
| <i>DES</i>    | NM_001927.3:c.1A>G                 | Initiator codon                   | substitution | Likely Pathogenic           |
| <i>DES</i>    | NM_001927.3:c.322G>T               | p.Glu108*                         | substitution | Pathogenic                  |
| <i>DES</i>    | NM_001927.3:c.1371+1G>A            | Splice site                       | substitution | Likely Pathogenic           |
| <i>DMD</i>    | NM_004006.2:c.6913-? 7098+?del     | Deletion (Exon 48)                | cnv          | Pathogenic                  |
| <i>DMD</i>    | NM_004006.2:c.94-? 960+?del        | Deletion (Exons 3-9)              | cnv          | Likely Pathogenic           |
| <i>DMD</i>    | NM_004006.2:c.7310-? 7660+?del     | Deletion (Exons 51-52)            | cnv          | Pathogenic                  |
| <i>DMD</i>    | NM_004006.2:c.8028-? 8217+?dup     | Gain (Exon 55)                    | cnv          | Likely Pathogenic           |
| <i>DMD</i>    | NM_004006.2:c.6474del              | p.Val2159Serfs                    | indel        | Pathogenic                  |
| <i>DSG2</i>   | NM_001943.3:c.2620del              | p.Thr874Leufs                     | indel        | Pathogenic                  |
| <i>DSG2</i>   | NM_001943.3:c.1672C>T              | p.Gln558*                         | substitution | Pathogenic                  |
| <i>DSP</i>    | NM_004415.2:c.5671 *1792delins16   | p.Glu1891Argfs                    | cnv          | Pathogenic                  |
| <i>DSP</i>    | NM_004415.2:c.2870 2874del         | p.Ser957*                         | indel        | Pathogenic                  |
| <i>DSP</i>    | NM_004415.2:c.5212C>T              | p.Arg1738*                        | substitution | Pathogenic                  |
| <i>DSP</i>    | NM_004415.2:c.250C>T               | p.Arg84*                          | substitution | Pathogenic                  |
| <i>DSP</i>    | NM_004415.2:c.85G>T                | p.Glu29*                          | substitution | Pathogenic                  |
| <i>DSP</i>    | NM_004415.2:c.2437-1G>C            | Splice site                       | substitution | Likely Pathogenic           |
| <i>ENG</i>    | NM_000118.3:c.511C>T               | p.Arg171*                         | substitution | Pathogenic                  |
| <i>EPCAM</i>  | NM_002354.2:c.-358-? 76+?del       | Deletion (Exon 1)                 | cnv          | Pathogenic                  |
| <i>F2</i>     | NM_000506.3:c.*97G>A               | Non-coding                        | substitution | Pathogenic (low penetrance) |
| <i>F5</i>     | NM_000130.4:c.1601G>A              | p.Arg534Gln                       | substitution | Pathogenic                  |
| <i>FH</i>     | NM_000143.3:c.1431 1433dupAAA      | p.Lys477dup                       | indel        | Likely Pathogenic           |
| <i>FH</i>     | NM_000143.3:c.782G>T               | p.Arg261Ile                       | substitution | Likely Pathogenic           |
| <i>FH</i>     | NM_000143.3:c.194A>G               | p.Asp65Gly                        | substitution | Likely Pathogenic           |
| <i>FH</i>     | NM_000143.3:c.1189G>A              | p.Gly397Arg                       | substitution | Pathogenic                  |
| <i>FH</i>     | NM_000143.3:c.521C>G               | p.Pro174Arg                       | substitution | Pathogenic                  |
| <i>FH</i>     | NM_000143.3:c.1093A>G              | p.Ser365Gly                       | substitution | Pathogenic                  |
| <i>FLCN</i>   | NM_144997.5:c.-504-? -228+?del     | Deletion (Exon 1)                 | cnv          | Pathogenic                  |
| <i>FLCN</i>   | NM_144997.5:c.584del               | p.Gly195Glufs                     | indel        | Pathogenic                  |
| <i>FLCN</i>   | NM_144997.5:c.521 527del           | p.Thrl74Argfs                     | indel        | Pathogenic                  |
| <i>FLNC</i>   | NM_001458.4:c.4581-? 4927+?del     | Deletion (Exons 27-28)            | cnv          | Pathogenic                  |
| <i>FLNC</i>   | NM_001458.4:c.2084del              | p.Arg695Leufs                     | indel        | Pathogenic                  |
| <i>FLNC</i>   | NM_001458.4:c.4882 4886delinsGCT   | p.Ile1628Alafs                    | indel        | Pathogenic                  |
| <i>FLNC</i>   | NM_001458.4:c.4926 4927insACGTCACA | p.Val1643Thrfs                    | indel        | Pathogenic                  |
| <i>FLNC</i>   | NM_001458.4:c.2119C>T              | p.Gln707*                         | substitution | Pathogenic                  |
| <i>FLNC</i>   | NM_001458.4:c.3791-1G>C            | Splice site                       | substitution | Pathogenic                  |
| <i>GLA</i>    | NM_000169.2:c.640-801G>A           | Intronic                          | substitution | Pathogenic                  |
| <i>GLA</i>    | NM_000169.2:c.335G>A               | p.Arg112His                       | substitution | Pathogenic                  |
| <i>GLA</i>    | NM_000169.2:c.644A>G               | p.Asn215Ser                       | substitution | Pathogenic                  |
| <i>HFE</i>    | NM_000410.3:c.762del               | p.Asp255Thrfs                     | indel        | Pathogenic                  |
| <i>HFE</i>    | NM_000410.3:c.211C>T               | p.Arg71*                          | substitution | Pathogenic                  |
| <i>HFE</i>    | NM_000410.3:c.845G>A               | p.Cys282Tyr                       | substitution | Pathogenic (low penetrance) |
| <i>HFE</i>    | NM_000410.3:c.502G>T               | p.Glu168*                         | substitution | Pathogenic                  |
| <i>HFE</i>    | NM_000410.3:c.187C>G               | p.His63Asp                        | substitution | Pathogenic (low penetrance) |
| <i>HFE</i>    | NM_000410.3:c.341-1G>A             | Splice site                       | substitution | Likely Pathogenic           |
| <i>HJV</i>    | NM_213653.3:c.959G>T               | p.Gly320Val                       | substitution | Pathogenic                  |
| <i>HJV</i>    | NM_213653.3:c.1097T>A              | p.Leu366*                         | substitution | Pathogenic                  |
| <i>HOXB13</i> | NM_006361.5:c.251G>A               | p.Gly84Glu                        | substitution | Increased Risk Allele       |
| <i>JUP</i>    | NM_002230.2:c.532 542del           | p.Alal78Leufs                     | indel        | Pathogenic                  |
| <i>JUP</i>    | NM_002230.2:c.902A>G               | p.Glu301Gly                       | substitution | Likely Pathogenic           |
| <i>JUP</i>    | NM_002230.2:c.545C>A               | p.Ser182*                         | substitution | Pathogenic                  |

|                |                                    |                           |              |                   |
|----------------|------------------------------------|---------------------------|--------------|-------------------|
| <i>KCNE1</i>   | NM 000219.5:c.292C>T               | p.Arg98Trp                | substitution | Likely Pathogenic |
| <i>KCNE1</i>   | NM 000219.5:c.226G>A               | p.Asp76Asn                | substitution | Pathogenic        |
| <i>KCNE1</i>   | NM 000219.5:c.172_177delinsCCCCCT  | p.Thr58_Leu59delinsProPro | substitution | Likely Pathogenic |
| <i>KCNH2</i>   | NM 172057.2:c.2692_2692+1insACACGG | Splice site               | indel        | Likely Pathogenic |
| <i>KCNQ1</i>   | NM 000218.2:c.1893dup              | p.Arg632Glnfs             | indel        | Pathogenic        |
| <i>KCNQ1</i>   | NM 000218.2:c.524_534del           | p.Leu175Argfs             | indel        | Pathogenic        |
| <i>KCNQ1</i>   | NM 000218.2:c.905C>T               | p.Ala302Val               | substitution | Likely Pathogenic |
| <i>KCNQ1</i>   | NM 000218.2:c.776G>A               | p.Arg259His               | substitution | Pathogenic        |
| <i>KCNQ1</i>   | NM 000218.2:c.502G>A               | p.Gly168Arg               | substitution | Pathogenic        |
| <i>KCNQ1</i>   | NM 000218.2:c.1085A>G              | p.Lys362Arg               | substitution | Pathogenic        |
| <i>KCNQ1</i>   | NM 000218.2:c.153C>G               | p.Tyr51*                  | substitution | Pathogenic        |
| <i>LDLR</i>    | NM 000527.4:c.-187-?_67+?del       | Deletion (Exon 1)         | cnv          | Pathogenic        |
| <i>LDLR</i>    | NM 000527.4:c.1846-?_2140+?del     | Deletion (Exons 13-14)    | cnv          | Pathogenic        |
| <i>LDLR</i>    | NM 000527.4:c.2390-?_*2514+?del    | Deletion (Exons 17-18)    | cnv          | Pathogenic        |
| <i>LDLR</i>    | NM 000527.4:c.1187-?_2140+?del     | Deletion (Exons 9-14)     | cnv          | Pathogenic        |
| <i>LDLR</i>    | NM 000527.4:c.2416dup              | p.Val806Glyfs             | indel        | Pathogenic        |
| <i>LDLR</i>    | NM 000527.4:c.-152C>T              | Non-coding                | substitution | Pathogenic        |
| <i>LDLR</i>    | NM 000527.4:c.1195G>A              | p.Ala399Thr               | substitution | Likely Pathogenic |
| <i>LDLR</i>    | NM 000527.4:c.1246C>T              | p.Arg416Trp               | substitution | Pathogenic        |
| <i>LDLR</i>    | NM 000527.4:c.1721G>A              | p.Arg574His               | substitution | Likely Pathogenic |
| <i>LDLR</i>    | NM 000527.4:c.1898G>A              | p.Arg633His               | substitution | Likely Pathogenic |
| <i>LDLR</i>    | NM 000527.4:c.241C>T               | p.Arg81Cys                | substitution | Likely Pathogenic |
| <i>LDLR</i>    | NM 000527.4:c.798T>A               | p.Asp266Glu               | substitution | Pathogenic        |
| <i>LDLR</i>    | NM 000527.4:c.912C>G               | p.Asp304Glu               | substitution | Pathogenic        |
| <i>LDLR</i>    | NM 000527.4:c.81C>G                | p.Cys27Trp                | substitution | Pathogenic        |
| <i>LDLR</i>    | NM 000527.4:c.1135T>C              | p.Cys379Arg               | substitution | Pathogenic        |
| <i>LDLR</i>    | NM 000527.4:c.2029T>C              | p.Cys677Arg               | substitution | Pathogenic        |
| <i>LDLR</i>    | NM 000527.4:c.301G>A               | p.Glu101Lys               | substitution | Pathogenic        |
| <i>LDLR</i>    | NM 000527.4:c.337G>A               | p.Glu113Lys               | substitution | Likely Pathogenic |
| <i>LDLR</i>    | NM 000527.4:c.1003G>A              | p.Gly335Ser               | substitution | Likely Pathogenic |
| <i>LDLR</i>    | NM 000527.4:c.1027G>A              | p.Gly343Ser               | substitution | Pathogenic        |
| <i>LDLR</i>    | NM 000527.4:c.1775G>A              | p.Gly592Glu               | substitution | Pathogenic        |
| <i>LDLR</i>    | NM 000527.4:c.1747C>T              | p.His583Tyr               | substitution | Pathogenic        |
| <i>LDLR</i>    | NM 000527.4:c.1745T>C              | p.Leu582Pro               | substitution | Likely Pathogenic |
| <i>LDLR</i>    | NM 000527.4:c.2054C>T              | p.Pro685Leu               | substitution | Pathogenic        |
| <i>LDLR</i>    | NM 000527.4:c.2096C>T              | p.Pro699Leu               | substitution | Likely Pathogenic |
| <i>LDLR</i>    | NM 000527.4:c.858C>A               | p.Ser286Arg               | substitution | Likely Pathogenic |
| <i>LDLR</i>    | NM 000527.4:c.11G>A                | p.Trp4*                   | substitution | Pathogenic        |
| <i>LDLR</i>    | NM 000527.4:c.2389G>A              | p.Val797Met               | substitution | Pathogenic        |
| <i>LDLRAP1</i> | Deletion                           | Entire coding sequence    | cnv          | Pathogenic        |
| <i>LDLRAP1</i> | NM 015627.2:c.65G>A                | p.Trp22*                  | substitution | Pathogenic        |
| <i>LMNA</i>    | NM 170707.3:c.992G>A               | p.Arg331Gln               | substitution | Pathogenic        |
| <i>LMNA</i>    | NM 170707.3:c.1130G>A              | p.Arg377His               | substitution | Pathogenic        |
| <i>LMNA</i>    | NM 170707.3:c.1580G>A              | p.Arg527His               | substitution | Pathogenic        |
| <i>MEN1</i>    | NM 130799.2:c.914del               | p.Gly305Alafs             | indel        | Pathogenic        |
| <i>MITF</i>    | NM 000248.3:c.952G>A               | p.Glu318Lys               | substitution | Pathogenic        |
| <i>MLH1</i>    | NM 000249.3:c.1852_1854del         | p.Lys618del               | indel        | Pathogenic        |
| <i>MLH1</i>    | NM 000249.3:c.116+5G>A             | Intronic                  | substitution | Likely Pathogenic |
| <i>MLH1</i>    | NM 000249.3:c.2041G>A              | p.Ala681Thr               | substitution | Pathogenic        |
| <i>MLH1</i>    | NM 000249.3:c.2142G>A              | p.Trp714*                 | substitution | Pathogenic        |
| <i>MLH1</i>    | NM 000249.3:c.1517T>C              | p.Val506Ala               | substitution | Likely Pathogenic |
| <i>MLH1</i>    | NM 000249.3:c.1896+1G>A            | Splice site               | substitution | Pathogenic        |
| <i>MSH2</i>    | NM 000251.2:c.1151dup              | p.Asp386Argfs             | indel        | Pathogenic        |
| <i>MSH2</i>    | NM 000251.2:c.2633_2634del         | p.Glu878Alafs             | indel        | Pathogenic        |
| <i>MSH2</i>    | NM 000251.2:c.190del               | p.Ile64Serfs              | indel        | Pathogenic        |
| <i>MSH2</i>    | NM 000251.2:c.1571G>C              | p.Arg524Pro               | substitution | Pathogenic        |
| <i>MSH2</i>    | NM 000251.2:c.2635-1G>T            | Splice site               | substitution | Likely Pathogenic |
| <i>MSH3</i>    | NM 002439.4:c.1654-?_1763+?del     | Deletion (Exon 12)        | cnv          | Pathogenic        |
| <i>MSH3</i>    | NM 002439.4:c.2668_2671del         | p.Arg890*                 | indel        | Pathogenic        |
| <i>MSH3</i>    | NM 002439.4:c.1648_1649dup         | p.Asn550Lysfs             | indel        | Pathogenic        |
| <i>MSH3</i>    | NM 002439.4:c.1035del              | p.Leu347*                 | indel        | Pathogenic        |

|        |                                   |                                   |              |                   |
|--------|-----------------------------------|-----------------------------------|--------------|-------------------|
| MSH3   | NM_002439.4:c.978_984del          | p.Phe326Leufs                     | indel        | Pathogenic        |
| MSH3   | NM_002439.4:c.1417dup             | p.Thr473Asnfs                     | indel        | Pathogenic        |
| MSH3   | NM_002439.4:c.2179C>T             | p.Arg727*                         | substitution | Pathogenic        |
| MSH3   | NM_002439.4:c.697G>T              | p.Glu233*                         | substitution | Pathogenic        |
| MSH3   | NM_002439.4:c.2686G>T             | p.Gly896*                         | substitution | Pathogenic        |
| MSH3   | NM_002439.4:c.2663C>G             | p.Ser888*                         | substitution | Pathogenic        |
| MSH3   | NM_002439.4:c.2319-1G>A           | Splice site                       | substitution | Pathogenic        |
| MSH3   | NM_002439.4:c.2655+1G>A           | Splice site                       | substitution | Likely Pathogenic |
| MSH6   | NM_000179.2:c.3959_3962del        | p.Ala1320Glufs                    | indel        | Pathogenic        |
| MSH6   | NM_000179.2:c.1519dup             | p.Arg507Lysfs                     | indel        | Pathogenic        |
| MSH6   | NM_000179.2:c.3964_3980dup        | p.Asn1327Lysfs                    | indel        | Pathogenic        |
| MSH6   | NM_000179.2:c.706_707del          | p.Gln236Argfs                     | indel        | Pathogenic        |
| MSH6   | NM_000179.2:c.3744_3773del        | p.His1248_Ser1257del              | indel        | Pathogenic        |
| MSH6   | NM_000179.2:c.3984_3987dup        | p.Leu1330Valfs                    | indel        | Pathogenic        |
| MSH6   | NM_000179.2:c.2677_2678del        | p.Leu893Alafs                     | indel        | Pathogenic        |
| MSH6   | NM_000179.2:c.3261dup             | p.Phe1088Leuufs                   | indel        | Pathogenic        |
| MSH6   | NM_000179.2:c.2269_2270del        | p.Thr757Profs                     | indel        | Pathogenic        |
| MSH6   | NM_000179.2:c.3226C>T             | p.Arg1076Cys                      | substitution | Pathogenic        |
| MSH6   | NM_000179.2:c.3227G>A             | p.Arg1076His                      | substitution | Likely Pathogenic |
| MSH6   | NM_000179.2:c.2731C>T             | p.Arg911*                         | substitution | Pathogenic        |
| MSH6   | NM_000179.2:c.463A>T              | p.Lys155*                         | substitution | Pathogenic        |
| MSH6   | NM_000179.2:c.901A>T              | p.Lys301*                         | substitution | Pathogenic        |
| MSH6   | NM_000179.2:c.1721C>G             | p.Ser574*                         | substitution | Pathogenic        |
| MSH6   | NM_000179.2:c.3556+2T>C           | Splice site                       | substitution | Likely Pathogenic |
| MUTYH  | NM_001128425.1:c.504+19_504+31del | Intronic                          | indel        | Pathogenic        |
| MUTYH  | NM_001128425.1:c.1147delC         | p.Ala385Profs                     | indel        | Pathogenic        |
| MUTYH  | NM_001128425.1:c.1437_1439delGGA  | p.Glu480del                       | indel        | Pathogenic        |
| MUTYH  | NM_001128425.1:c.933+3A>C         | Intronic                          | substitution | Pathogenic        |
| MUTYH  | NM_001128425.1:c.55C>T            | p.Arg19*                          | substitution | Pathogenic        |
| MUTYH  | NM_001128425.1:c.722G>A           | p.Arg241Gln                       | substitution | Likely Pathogenic |
| MUTYH  | NM_001128425.1:c.734G>A           | p.Arg245His                       | substitution | Pathogenic        |
| MUTYH  | NM_001128425.1:c.739C>T           | p.Arg247*                         | substitution | Pathogenic        |
| MUTYH  | NM_001128425.1:c.1012C>T          | p.Gln338*                         | substitution | Pathogenic        |
| MUTYH  | NM_001128425.1:c.1187G>A          | p.Gly396Asp                       | substitution | Pathogenic        |
| MUTYH  | NM_001128425.1:c.884C>T           | p.Pro295Leu                       | substitution | Likely Pathogenic |
| MUTYH  | NM_001128425.1:c.1214C>T          | p.Pro405Leu                       | substitution | Pathogenic        |
| MUTYH  | NM_001128425.1:c.521G>A           | p.Trp174*                         | substitution | Pathogenic        |
| MUTYH  | NM_001128425.1:c.536A>G           | p.Tyr179Cys                       | substitution | Pathogenic        |
| MUTYH  | NM_001128425.1:c.789-2A>C         | Splice site                       | substitution | Likely Pathogenic |
| MUTYH  | NM_001128425.1:c.1187-2A>G        | Splice site                       | substitution | Pathogenic        |
| MUTYH  | NM_001128425.1:c.1477-1G>A        | Splice site                       | substitution | Likely Pathogenic |
| MYBPC3 | NM_000256.3:c.3628-41_3628-17del  | Intronic                          | indel        | Pathogenic        |
| MYBPC3 | NM_000256.3:c.2864_2865del        | p.Pro955Argfs                     | indel        | Pathogenic        |
| MYBPC3 | NM_000256.3:c.1504C>T             | p.Arg502Trp                       | substitution | Pathogenic        |
| MYBPC3 | NM_000256.3:c.1828G>C             | p.Asp610His                       | substitution | Likely Pathogenic |
| MYBPC3 | NM_000256.3:c.1624G>C             | p.Glu542Gln                       | substitution | Pathogenic        |
| MYBPC3 | NM_000256.3:c.1591G>C             | p.Gly531Arg                       | substitution | Likely Pathogenic |
| MYBPC3 | NM_000256.3:c.655G>C              | p.Val219Leu                       | substitution | Pathogenic        |
| MYBPC3 | NM_000256.3:c.821+1G>A            | Splice site                       | substitution | Pathogenic        |
| MYBPC3 | NM_000256.3:c.927-2A>G            | Splice site                       | substitution | Pathogenic        |
| MYH11  | NM_001040113.1:c.-17-? *8+?del    | Deletion (Entire coding sequence) | cnv          | Pathogenic        |
| MYH11  | NM_001040113.1:c.-107-? *997+?del | Deletion (Entire coding sequence) | cnv          | Pathogenic        |
| MYH11  | NM_001040113.1:c.3624_3628dup     | p.Gln1210Profs                    | indel        | Pathogenic        |
| MYH7   | NM_000257.3:c.3134G>T             | p.Arg1045Leu                      | substitution | Pathogenic        |
| MYH7   | NM_000257.3:c.5135G>A             | p.Arg1712Gln                      | substitution | Likely Pathogenic |
| MYH7   | NM_000257.3:c.5134C>T             | p.Arg1712Trp                      | substitution | Pathogenic        |
| MYH7   | NM_000257.3:c.5342G>A             | p.Arg1781His                      | substitution | Likely Pathogenic |
| MYH7   | NM_000257.3:c.611G>A              | p.Arg204His                       | substitution | Pathogenic        |
| MYH7   | NM_000257.3:c.1207C>T             | p.Arg403Trp                       | substitution | Pathogenic        |
| MYH7   | NM_000257.3:c.1988G>A             | p.Arg663His                       | substitution | Pathogenic        |
| MYH7   | NM_000257.3:c.2080C>T             | p.Arg694Cys                       | substitution | Likely Pathogenic |

|       |                                 |                                   |              |                   |
|-------|---------------------------------|-----------------------------------|--------------|-------------------|
| MYH7  | NM 000257.3:c.2167C>T           | p.Arg723Cys                       | substitution | Pathogenic        |
| MYH7  | NM 000257.3:c.2221G>T           | p.Gly741Trp                       | substitution | Pathogenic        |
| MYH7  | NM 000257.3:c.1727A>G           | p.His576Arg                       | substitution | Likely Pathogenic |
| MYH7  | NM 000257.3:c.5561C>T           | p.Thr1854Met                      | substitution | Likely Pathogenic |
| MYH7  | NM 000257.3:c.5655G>A           | Silent                            | substitution | Pathogenic        |
| MYLK  | NM 053025.3:c.3715del           | p.Gln1239Argfs                    | indel        | Pathogenic        |
| NBN   | NM 002485.4:c.897-? 2184+?del   | Deletion (Exons 8-14)             | cnv          | Pathogenic        |
| NBN   | NM 002485.4:c.35 37+10del       | Partial deletion (Exon 1)         | cnv          | Likely Pathogenic |
| NBN   | NM 002485.4:c.163 171+3del      | Partial deletion (Exon 2)         | cnv          | Likely Pathogenic |
| NBN   | NM 002485.4:c.657 661delACAAA   | p.Lys219Asnfs                     | indel        | Pathogenic        |
| NBN   | NM 002485.4:c.698 701del        | p.Lys233Serfs                     | indel        | Pathogenic        |
| NBN   | NM 002485.4:c.156 157del        | p.Ser53Cysfs                      | indel        | Pathogenic        |
| NBN   | NM 002485.4:c.1737del           | p.Val580Phefs                     | indel        | Pathogenic        |
| NBN   | NM 002485.4:c.2140C>T           | p.Arg714*                         | substitution | Pathogenic        |
| NBN   | NM 002485.4:c.1903A>T           | p.Lys635*                         | substitution | Pathogenic        |
| NBN   | NM 002485.4:c.1496C>A           | p.Ser499*                         | substitution | Pathogenic        |
| NBN   | NM 002485.4:c.481-2A>T          | Splice site                       | substitution | Likely Pathogenic |
| NBN   | NM 002485.4:c.2234+2T>G         | Splice site                       | substitution | Likely Pathogenic |
| NF1   | NM 000267.3:c.244 247del        | p.Gln83*                          | indel        | Pathogenic        |
| NF1   | NM 000267.3:c.4537C>T           | p.Arg1513*                        | substitution | Pathogenic        |
| NF1   | NM 000267.3:c.7486C>T           | p.Arg2496*                        | substitution | Pathogenic        |
| NF1   | NM 000267.3:c.2044C>T           | p.Gln682*                         | substitution | Pathogenic        |
| NF1   | NM 000267.3:c.5431G>T           | p.Glu1811*                        | substitution | Pathogenic        |
| NF2   | NM 000268.3:c.-443-? *3798+?del | Deletion (Entire coding sequence) | cnv          | Pathogenic        |
| NF2   | NM 000268.3:c.1575-? 1737+?dup  | Gain (Exon 15)                    | cnv          | Likely Pathogenic |
| NTHL1 | NM 002528.6:c.235dup            | p.Ala79Glyfs                      | indel        | Pathogenic        |
| NTHL1 | NM 002528.6:c.484del            | p.Asp162Thrfs                     | indel        | Pathogenic        |
| NTHL1 | NM 002528.6:c.859C>T            | p.Gln287*                         | substitution | Likely Pathogenic |
| NTHL1 | NM 002528.6:c.268C>T            | p.Gln90*                          | substitution | Pathogenic        |
| NTHL1 | NM 002528.6:c.806G>A            | p.Trp269*                         | substitution | Likely Pathogenic |
| NTHL1 | NM 002528.6:c.390C>A            | p.Tyr130*                         | substitution | Pathogenic        |
| NTHL1 | NM 002528.6:c.139+1G>A          | Splice site                       | substitution | Likely Pathogenic |
| NTHL1 | NM 002528.6:c.550-1G>A          | Splice site                       | substitution | Pathogenic        |
| PALB2 | NM 024675.3:c.3114-? 3201+?del  | Deletion (Exon 11)                | cnv          | Pathogenic        |
| PALB2 | NM 024675.3:c.509 510del        | p.Arg170Ilefs                     | indel        | Pathogenic        |
| PALB2 | NM 024675.3:c.3179 3180ins(?)   | p.Cys1060fs                       | indel        | Pathogenic        |
| PALB2 | NM 024675.3:c.1675 1676delinsTG | p.Gln559*                         | indel        | Pathogenic        |
| PALB2 | NM 024675.3:c.172 175del        | p.Gln60Argfs                      | indel        | Pathogenic        |
| PALB2 | NM 024675.3:c.532del            | p.Glu178Asnfs                     | indel        | Pathogenic        |
| PALB2 | NM 024675.3:c.1824dup           | p.Ile609Tyrfs                     | indel        | Pathogenic        |
| PALB2 | NM 024675.3:c.1592del           | p.Leu531Cysfs                     | indel        | Pathogenic        |
| PALB2 | NM 024675.3:c.3482 3483del      | p.Phe1161Cysfs                    | indel        | Pathogenic        |
| PALB2 | NM 024675.3:c.3456dup           | p.Pro1153Thrfs                    | indel        | Pathogenic        |
| PALB2 | NM 024675.3:c.1965del           | p.Pro656Glnfs                     | indel        | Pathogenic        |
| PALB2 | NM 024675.3:c.758dup            | p.Ser254Ilefs                     | indel        | Pathogenic        |
| PALB2 | NM 024675.3:c.899del            | p.Thr300Lysfs                     | indel        | Pathogenic        |
| PALB2 | NM 024675.3:c.1677del           | p.Val560*                         | indel        | Pathogenic        |
| PALB2 | NM 024675.3:c.2964del           | p.Val989*                         | indel        | Pathogenic        |
| PALB2 | NM 024675.3:c.2257C>T           | p.Arg753*                         | substitution | Pathogenic        |
| PALB2 | NM 024675.3:c.196C>T            | p.Gln66*                          | substitution | Pathogenic        |
| PALB2 | NM 024675.3:c.1010T>A           | p.Leu337*                         | substitution | Pathogenic        |
| PALB2 | NM 024675.3:c.3113G>A           | p.Trp1038*                        | substitution | Pathogenic        |
| PALB2 | NM 024675.3:c.3549C>A           | p.Tyr1183*                        | substitution | Pathogenic        |
| PALB2 | NM 024675.3:c.3549C>G           | p.Tyr1183*                        | substitution | Pathogenic        |
| PCSK9 | NM 174936.3:c.1394C>T           | p.Ser465Leu                       | substitution | Likely Pathogenic |
| PKP2  | NM 004572.3:c.1171-? 1378+?del  | Deletion (Exon 5)                 | cnv          | Pathogenic        |
| PKP2  | NM 004572.3:c.2293 2299+1008del | Partial deletion (Exon 11)        | cnv          | Likely Pathogenic |
| PKP2  | NM 004572.3:c.1237C>T           | p.Arg413*                         | substitution | Pathogenic        |
| PKP2  | NM 004572.3:c.1978C>T           | p.Gln660*                         | substitution | Pathogenic        |
| PKP2  | NM 004572.3:c.1613G>A           | p.Trp538*                         | substitution | Pathogenic        |
| PKP2  | NM 004572.3:c.337-2A>T          | Splice site                       | substitution | Pathogenic        |



|               |                                        |                               |              |                   |
|---------------|----------------------------------------|-------------------------------|--------------|-------------------|
| <i>PKP2</i>   | NM_004572.3:c.2146-1G>C                | Splice site                   | substitution | Pathogenic        |
| <i>PKP2</i>   | NM_004572.3:c.2489+1G>A                | Splice site                   | substitution | Pathogenic        |
| <i>PLN</i>    | NM_002667.3:c.26_29dup                 | p.Ala11Leufs                  | indel        | Pathogenic        |
| <i>PLN</i>    | NM_002667.3:c.26G>A                    | p.Arg9His                     | substitution | Likely Pathogenic |
| <i>PLN</i>    | NM_002667.3:c.116T>G                   | p.Leu39*                      | substitution | Pathogenic        |
| <i>PMS2</i>   | NM_000535.5:c.24-?_163+?del            | Deletion (Exon 2)             | cnv          | Pathogenic        |
| <i>PMS2</i>   | NM_000535.5:c.904-?_1144+?del          | Deletion (Exons 9-10)         | cnv          | Pathogenic        |
| <i>PMS2</i>   | Deletion                               | Entire coding sequence        | cnv          | Pathogenic        |
| <i>PMS2</i>   | Deletion                               | Exons 12-15                   | cnv          | Pathogenic        |
| <i>PMS2</i>   | NM_000535.5:c.862_863del               | p.Gln288Valfs                 | indel        | Pathogenic        |
| <i>PMS2</i>   | NM_000535.5:c.1831dup                  | p.Ile611Asnfs                 | indel        | Pathogenic        |
| <i>PMS2</i>   | NM_000535.5:c.736_741delinsTGTGTGTGAAG | p.Pro246Cysfs                 | indel        | Pathogenic        |
| <i>PMS2</i>   | NM_000535.5:c.1638_1639del             | p.Ser547Argfs                 | indel        | Pathogenic        |
| <i>PMS2</i>   | NM_000535.5:c.1009dup                  | p.Thr337Asnfs                 | indel        | Pathogenic        |
| <i>PMS2</i>   | NM_000535.5:c.943C>T                   | p.Arg315*                     | substitution | Pathogenic        |
| <i>PMS2</i>   | NM_000535.5:c.949C>T                   | p.Gln317*                     | substitution | Pathogenic        |
| <i>PMS2</i>   | NM_000535.5:c.2249G>A                  | p.Gly750Asp                   | substitution | Likely Pathogenic |
| <i>PMS2</i>   | NM_000535.5:c.1939A>T                  | p.Lys647*                     | substitution | Pathogenic        |
| <i>PMS2</i>   | NM_000535.5:c.137G>A                   | p.Ser46Asn                    | substitution | Pathogenic        |
| <i>PMS2</i>   | NM_000535.5:c.137G>T                   | p.Ser46Ile                    | substitution | Pathogenic        |
| <i>PMS2</i>   | NM_000535.5:c.2444C>T                  | p.Ser815Leu                   | substitution | Likely Pathogenic |
| <i>PMS2</i>   | NM_000535.5:c.765C>A                   | p.Tyr255*                     | substitution | Pathogenic        |
| <i>PROC</i>   | NM_000312.3:c.1212dup                  | p.Pro405Alafs                 | indel        | Pathogenic        |
| <i>PROC</i>   | NM_000312.3:c.925G>A                   | p.Ala309Thr                   | substitution | Pathogenic        |
| <i>PROC</i>   | NM_000312.3:c.631C>T                   | p.Arg211Trp                   | substitution | Pathogenic        |
| <i>PROC</i>   | NM_000312.3:c.659G>A                   | p.Arg220Gln                   | substitution | Likely Pathogenic |
| <i>PROC</i>   | NM_000312.3:c.811C>T                   | p.Arg271Trp                   | substitution | Likely Pathogenic |
| <i>PROC</i>   | NM_000312.3:c.169C>T                   | p.Arg577Trp                   | substitution | Pathogenic        |
| <i>PROC</i>   | NM_000312.3:c.889G>C                   | p.Asp297His                   | substitution | Pathogenic        |
| <i>PROC</i>   | NM_000312.3:c.41G>A                    | p.Trp14*                      | substitution | Pathogenic        |
| <i>PROS1</i>  | NM_000313.3:c.1155+5G>A                | Intronic                      | substitution | Pathogenic        |
| <i>PROS1</i>  | NM_000313.3:c.1064G>A                  | p.Arg355His                   | substitution | Likely Pathogenic |
| <i>PROS1</i>  | NM_000313.3:c.200A>C                   | p.Glu67Ala                    | substitution | Likely Pathogenic |
| <i>PROS1</i>  | NM_000313.3:c.586A>G                   | p.Lys196Glu                   | substitution | Pathogenic        |
| <i>PROS1</i>  | NM_000313.3:c.601+1G>A                 | Splice site                   | substitution | Likely Pathogenic |
| <i>RAD51C</i> | NM_058216.2:c.572-?_*120+?del          | Deletion (Exons 4-9)          | cnv          | Pathogenic        |
| <i>RAD51C</i> | NM_058216.2:c.838-?_*120+?del          | Deletion (Exons 6-9)          | cnv          | Pathogenic        |
| <i>RAD51C</i> | NM_058216.2:c.732del                   | p.Ile244Metfs                 | indel        | Pathogenic        |
| <i>RAD51C</i> | NM_058216.2:c.181_182del               | p.Leu61Alafs                  | indel        | Pathogenic        |
| <i>RAD51C</i> | NM_058216.2:c.50del                    | p.Phe17Serfs                  | indel        | Pathogenic        |
| <i>RAD51C</i> | NM_058216.2:c.93del                    | p.Phe32Serfs                  | indel        | Pathogenic        |
| <i>RAD51C</i> | NM_058216.2:c.904+5G>T                 | Intronic                      | substitution | Likely Pathogenic |
| <i>RAD51C</i> | NM_058216.2:c.397C>T                   | p.Gln133*                     | substitution | Pathogenic        |
| <i>RAD51C</i> | NM_058216.2:c.905-2A>C                 | Splice site                   | substitution | Pathogenic        |
| <i>RAD51D</i> | NM_002878.3:c.-256-?_738+?del          | Deletion (Exons 1-8)          | cnv          | Pathogenic        |
| <i>RAD51D</i> | NM_002878.3:c.896_*505del              | Partial deletion (Exons 9-10) | cnv          | Likely Pathogenic |
| <i>RAD51D</i> | NM_002878.3:c.363del                   | p.Ala122Glnfs                 | indel        | Pathogenic        |
| <i>RAD51D</i> | NM_002878.3:c.270_271dup               | p.Lys91Ilefs                  | indel        | Pathogenic        |
| <i>RAD51D</i> | NM_002878.3:c.620C>T                   | p.Ser207Leu                   | substitution | Pathogenic        |
| <i>RAD51D</i> | NM_002878.3:c.803G>A                   | p.Trp268*                     | substitution | Pathogenic        |
| <i>RAD51D</i> | NM_002878.3:c.83-1G>A                  | Splice site                   | substitution | Likely Pathogenic |
| <i>RAD51D</i> | NM_002878.3:c.577-2A>G                 | Splice site                   | substitution | Likely Pathogenic |
| <i>RBI</i>    | NM_000321.2:c.309_312del               | p.Phe104Leufs                 | indel        | Pathogenic        |
| <i>RBI</i>    | NM_000321.2:c.1981C>T                  | p.Arg661Trp                   | substitution | Pathogenic        |
| <i>RET</i>    | NM_020975.4:c.1826G>A                  | p.Cys609Tyr                   | substitution | Pathogenic        |
| <i>RET</i>    | NM_020975.4:c.2304G>C                  | p.Glu768Asp                   | substitution | Likely Pathogenic |
| <i>RET</i>    | NM_020975.4:c.1998G>T                  | p.Lys666Asn                   | substitution | Pathogenic        |
| <i>RET</i>    | NM_020975.4:c.2410G>A                  | p.Val804Met                   | substitution | Pathogenic        |
| <i>RYR1</i>   | NM_000540.2:c.5077_5078delinsG         | p.Leu1693Glyfs                | indel        | Pathogenic        |
| <i>RYR1</i>   | NM_000540.2:c.9554dup                  | p.Leu3186Alafs                | indel        | Pathogenic        |
| <i>RYR1</i>   | NM_000540.2:c.10960del                 | p.Leu3654Trpfs                | indel        | Pathogenic        |

|                 |                                      |                        |              |                             |
|-----------------|--------------------------------------|------------------------|--------------|-----------------------------|
| <i>RYR1</i>     | NM 000540.2:c.13335del               | p.Phe4446Serfs         | indel        | Pathogenic                  |
| <i>RYR1</i>     | NM 000540.2:c.8843del                | p.Ser2948Cysfs         | indel        | Pathogenic                  |
| <i>RYR1</i>     | NM 000540.2:c.4225C>T                | p.Arg1409*             | substitution | Pathogenic                  |
| <i>RYR1</i>     | NM 000540.2:c.6721C>T                | p.Arg2241*             | substitution | Pathogenic                  |
| <i>RYR1</i>     | NM 000540.2:c.11314C>T               | p.Arg3772Trp           | substitution | Pathogenic                  |
| <i>RYR1</i>     | NM 000540.2:c.11708G>A               | p.Arg3903Gln           | substitution | Pathogenic                  |
| <i>RYR1</i>     | NM 000540.2:c.1589G>A                | p.Arg530His            | substitution | Pathogenic                  |
| <i>RYR1</i>     | NM 000540.2:c.1597C>T                | p.Arg533Cys            | substitution | Pathogenic                  |
| <i>RYR1</i>     | NM 000540.2:c.10204T>G               | p.Cys3402Gly           | substitution | Pathogenic                  |
| <i>RYR1</i>     | NM 000540.2:c.7300G>A                | p.Gly2434Arg           | substitution | Pathogenic                  |
| <i>RYR1</i>     | NM 000540.2:c.14344G>A               | p.Gly4782Arg           | substitution | Pathogenic                  |
| <i>RYR1</i>     | NM 000540.2:c.14645C>T               | p.Thr4882Met           | substitution | Pathogenic                  |
| <i>RYR1</i>     | NM 000540.2:c.3381+1G>A              | Splice site            | substitution | Pathogenic                  |
| <i>RYR1</i>     | NM 000540.2:c.8311-1G>C              | Splice site            | substitution | Likely Pathogenic           |
| <i>SCN5A</i>    | NM 198056.2:c.845G>A                 | p.Arg282His            | substitution | Pathogenic                  |
| <i>SCN5A</i>    | NM 198056.2:c.5302A>G                | p.Ile1768Val           | substitution | Pathogenic                  |
| <i>SDHA</i>     | NM 004168.3:c.253 256dup             | p.Asn86Ilefs           | indel        | Pathogenic                  |
| <i>SDHA</i>     | NM 004168.3:c.667del                 | p.Asp223Ilefs          | indel        | Pathogenic                  |
| <i>SDHA</i>     | NM 004168.3:c.688del                 | p.Glu230Serfs          | indel        | Pathogenic                  |
| <i>SDHA</i>     | NM 004168.3:c.378del                 | p.Val127*              | indel        | Pathogenic                  |
| <i>SDHA</i>     | NM 004168.3:c.91C>T                  | p.Arg31*               | substitution | Pathogenic                  |
| <i>SDHA</i>     | NM 004168.3:c.223C>T                 | p.Arg75*               | substitution | Pathogenic                  |
| <i>SDHA</i>     | NM 004168.3:c.1064+2T>A              | Splice site            | substitution | Likely Pathogenic           |
| <i>SDHA</i>     | NM 004168.3:c.621+1G>A               | Splice site            | substitution | Likely Pathogenic           |
| <i>SDHA</i>     | NM 004168.3:c.150+1G>A               | Splice site            | substitution | Likely Pathogenic           |
| <i>SDHAF2</i>   | NM 017841.2:c.199del                 | p.Arg67Glufs           | indel        | Pathogenic                  |
| <i>SDHB</i>     | Deletion                             | Entire coding sequence | cnv          | Pathogenic                  |
| <i>SDHB</i>     | NM 003000.2:c.311delinsGG            | p.Asn104Argfs          | indel        | Pathogenic                  |
| <i>SDHB</i>     | NM 003000.2:c.640C>T                 | p.Gln214*              | substitution | Pathogenic                  |
| <i>SDHB</i>     | NM 003000.2:c.380T>G                 | p.Ile127Ser            | substitution | Pathogenic                  |
| <i>SDHB</i>     | NM 003000.2:c.600G>T                 | p.Trp200Cys            | substitution | Pathogenic                  |
| <i>SDHB</i>     | NM 003000.2:c.72+1G>T                | Splice site            | substitution | Pathogenic                  |
| <i>SDHC</i>     | NM 003001.3:c.397C>T                 | p.Arg133*              | substitution | Pathogenic                  |
| <i>SDHC</i>     | NM 003001.3:c.148C>T                 | p.Arg50Cys             | substitution | Likely Pathogenic           |
| <i>SDHD</i>     | NM 003002.3:c.242C>T                 | p.Pro81Leu             | substitution | Pathogenic                  |
| <i>SERPINA1</i> | NM 000295.4:c.1108 1115delinsAAAAACA | p.Glu370Lysfs          | indel        | Pathogenic                  |
| <i>SERPINA1</i> | NM 000295.4:c.227 229delTCT          | p.Phe76del             | indel        | Pathogenic                  |
| <i>SERPINA1</i> | NM 000295.4:c.187C>T                 | p.Arg63Cys             | substitution | Likely Pathogenic           |
| <i>SERPINA1</i> | NM 000295.4:c.839A>T                 | p.Asp280Val            | substitution | Pathogenic                  |
| <i>SERPINA1</i> | NM 000295.4:c.863A>T                 | p.Glu288Val            | substitution | Pathogenic (low penetrance) |
| <i>SERPINA1</i> | NM 000295.4:c.1096G>A                | p.Glu366Lys            | substitution | Pathogenic                  |
| <i>SERPINA1</i> | NM 000295.4:c.194T>C                 | p.Leu65Pro             | substitution | Likely Pathogenic           |
| <i>SERPINA1</i> | NM 000295.4:c.1177C>T                | p.Pro393Ser            | substitution | Pathogenic                  |
| <i>SERPINC1</i> | NM 000488.3:c.236G>A                 | p.Arg79His             | substitution | Likely Pathogenic           |
| <i>SERPINC1</i> | NM 000488.3:c.391C>T                 | p.Leu131Phe            | substitution | Pathogenic                  |
| <i>SERPINC1</i> | NM 000488.3:c.218C>T                 | p.Pro73Leu             | substitution | Pathogenic                  |
| <i>SGCD</i>     | NM 000337.5:c.-43-? 192+?del         | Deletion (Exons 2-3)   | cnv          | Pathogenic                  |
| <i>SLC40A1</i>  | NM 014585.5:c.626C>T                 | p.Ser209Leu            | substitution | Pathogenic                  |
| <i>SMARCB1</i>  | NM 003073.3:c.629-? 795+?dup         | Gain (Exon 6)          | cnv          | Pathogenic                  |
| <i>TCAP</i>     | NM 003673.3:c.26 33dup               | p.Glu12Argfs           | indel        | Pathogenic                  |
| <i>TFR2</i>     | NM 003227.3:c.-41-? 473+?del         | Deletion (Exons 1-3)   | cnv          | Pathogenic                  |
| <i>TFR2</i>     | NM 003227.3:c.2014C>T                | p.Gln672*              | substitution | Pathogenic                  |
| <i>TGFBR1</i>   | NM 004612.2:c.469C>T                 | p.Arg157*              | substitution | Pathogenic                  |
| <i>TNNI3</i>    | NM 000363.4:c.497C>T                 | p.Ser166Phe            | substitution | Likely Pathogenic           |
| <i>TP53</i>     | NM 000546.5:c.810dup                 | p.Glu271*              | indel        | Pathogenic                  |
| <i>TP53</i>     | NM 000546.5:c.524G>A                 | p.Arg175His            | substitution | Pathogenic                  |
| <i>TP53</i>     | NM 000546.5:c.542G>A                 | p.Arg181His            | substitution | Pathogenic                  |
| <i>TP53</i>     | NM 000546.5:c.530C>T                 | p.Pro177Leu            | substitution | Likely Pathogenic           |
| <i>TP53</i>     | NM 000546.5:c.655C>T                 | p.Pro219Ser            | substitution | Likely Pathogenic           |
| <i>TP53</i>     | NM 000546.5:c.380C>T                 | p.Ser127Phe            | substitution | Likely Pathogenic           |
| <i>TP53</i>     | NM 000546.5:c.374C>T                 | p.Thr125Met            | substitution | Pathogenic                  |

|             |                          |              |              |                   |
|-------------|--------------------------|--------------|--------------|-------------------|
| <i>TSC1</i> | NM_000368.4:c.10C>T      | p.Gln4*      | substitution | Pathogenic        |
| <i>TSC1</i> | NM_000368.4:c.1439-1G>A  | Splice site  | substitution | Likely Pathogenic |
| <i>VHL</i>  | NM_000551.3:c.179_192del | p.Arg60Leufs | indel        | Pathogenic        |
| <i>VHL</i>  | NM_000551.3:c.598C>T     | p.Arg200Trp  | substitution | Pathogenic        |
| <i>VHL</i>  | NM_000551.3:c.467A>G     | p.Tyr156Cys  | substitution | Likely Pathogenic |
